# Supplementary material for: Mathematical Optimization Strategy for Effectiveness Profile Estimation in Two-Dose Vaccines and Its Use in Designing Improved Vaccination Strategies Focused on Pandemic Containment
Source: MDPI journal article supplement (doi:10.3390/vaccines12010081), 2024-01-12
Supplement: s1 [file s1]

## Supplementary Material SM1.

---

Tailored PSO algorithm used to fit the experimental data

---

Initialize the control parameters  $N, C_1, C_2, W_{min}, W_{Max}, V_{min}, V_{Max}, N_{iter}$

Initialize the  $N$  particles

While iteration  $< N_{iter}$

For each particle

Calculate the fitness

Actualize the particle's optimal

Actualize the population's optimal

Actualize the particle's inertia

For each particle

Actualize the particle's velocity

Actualize the particle's position

Obtain a mean mobile of the particle's dimensions (for smoothness)

Return the population's optimal as the solution found

---
