# Supplementary material for: Mathematical Optimization Strategy for Effectiveness Profile Estimation in Two-Dose Vaccines and Its Use in Designing Improved Vaccination Strategies Focused on Pandemic Containment
Source: MDPI journal article supplement (doi:10.3390/vaccines12010081), 2024-01-12
Supplement: s1 [file s1]

## Supplementary Material SM5

**Table S1.** Reference values and search intervals for the fitting process of the individual vaccine effectiveness profiles.

| Parameter  | Reference values | Search interval |
|------------|------------------|-----------------|
| $A_L$      | 3.0              | 2.5 to 5.0      |
| $B_L$      | 2.5              | -2.0 to 4.0     |
| $C_L$      | 0.02             | -5.00 to 5.00   |
| $D_L$      | -70              | -100 to -40     |
| $A_R$      | -5.0             | -10.0 to -4.5   |
| $B_R$      | 5.0              | -5.0 to 5.4     |
| $C_R$      | 0.015            | 0.010 to 5.000  |
| $D_R$      | 50               | 0 to 100        |
| $Q$        | 0.3              | 0.15 to 0.85    |
| $\Delta k$ | 35               | 28 to 45        |
