# Supplementary material for: Mathematical Optimization Strategy for Effectiveness Profile Estimation in Two-Dose Vaccines and Its Use in Designing Improved Vaccination Strategies Focused on Pandemic Containment
Source: Vaccines (Basel). 2024 Jan 12;12(1):81. doi: 10.3390/vaccines12010081 (PMC10819090; doi:10.3390/vaccines12010081)
Supplement: Supplementary file 1 [file vaccines-12-00081-s001.zip]

Archive with 7 entries (7 files):
- Supplementary Material SM1.pdf
- Supplementary Material SM2.xlsx
- Supplementary Material SM3.xlsx
- Supplementary Material SM4a.mp4
- Supplementary Material SM4b.mp4
- Supplementary Material SM5.pdf
- Supplementary Material SM6.pdf
