# Supplementary material for: Mathematical Optimization Strategy for Effectiveness Profile Estimation in Two-Dose Vaccines and Its Use in Designing Improved Vaccination Strategies Focused on Pandemic Containment
Source: Vaccines (Basel). 2024 Jan 12;12(1):81. doi: 10.3390/vaccines12010081 (PMC10819090; doi:10.3390/vaccines12010081)
Supplement: Supplementary file 1 [file vaccines-12-00081-s001.zip › Supplementary Material SM2.xlsx]

## Sheet: Individual Profiles Fitting
	t	E		Parameters		Min	Max	Final	Ref		k	TANH LF1	TANH LF 2	TANH LF	TANH RT1	TANH RT2	TANH RT TEM	TANH RT	RESULT	OBJECTIVE	DEVIATION	DEVIATION ^2
0	-62	0.00346331		LF1	A	2.5	5	2.66029	3		-62	-0.50577	8.214	0	-1.28582	8.96637	0	0	0	0.00346331	0.00346331	1.19945e-05		MEAN DEVIATION ^2
1	-61	0.00346331			B	-2	4	1.88194	2.5		-61	-0.49928	8.13356	0	-1.28353	8.91451	0	0	0	0.00346331	0.00346331	1.19945e-05		0.000599318
2	-60	0.00346331			C	-5	5	0.0124088	0.02		-60	-0.492644	8.05142	0	-1.28116	8.86152	0	0	0	0.00346331	0.00346331	1.19945e-05
3	-59	0.00350201			D	-100	-40	-55.6108	-70		-59	-0.48586	7.96762	0	-1.27872	8.80741	0	0	0	0.00350201	0.00350201	1.22641e-05
4	-58	0.00349976		LF2	A	-10	-4.5	-5.37166	-5		-58	-0.478923	7.88216	0	-1.27622	8.75216	0	0	0	0.00349976	0.00349976	1.22483e-05
5	-57	0.00364166			B	-5	5.4	5.39861	5		-57	-0.471833	7.79507	0	-1.27363	8.69577	0	0	0	0.00364166	0.00364166	1.32617e-05
6	-56	0.00386265			C	0.01	5	0.0204288	0.015		-56	-0.464585	7.70637	0	-1.27098	8.63824	0	0	0	0.00386265	0.00386265	1.49201e-05
7	-55	0.00390853			D	0	100	33.5107	50		-55	-0.457177	7.61611	0	-1.26824	8.57956	0	0	0	0.00390853	0.00390853	1.52766e-05
8	-54	0.00405297		RT1	A	2.5	5	3.45727	3		-54	-0.449605	7.52432	0	-1.26542	8.51974	0	0	0	0.00405297	0.00405297	1.64265e-05
9	-53	0.00448562			B	-2	4	2.09465	2.5		-53	-0.441866	7.43102	0	-1.26252	8.45877	0	0	0	0.00448562	0.00448562	2.01208e-05
10	-52	0.00476597			C	-5	5	0.0149115	0.02		-52	-0.433958	7.33628	0	-1.25954	8.39665	0	0	0	0.00476597	0.00476597	2.27145e-05
11	-51	0.00477919			D	-100	-40	-56.5665	-70		-51	-0.425878	7.24012	0	-1.25647	8.33339	0	0	0	0.00477919	0.00477919	2.28406e-05
12	-50	0.0051291		RT2	A	-10	-4.5	-5.43781	-5		-50	-0.417621	7.14261	0	-1.2533	8.26899	0	0	0	0.0051291	0.0051291	2.63076e-05
13	-49	0.00566283			B	-5	5.4	5.4	5		-49	-0.409186	7.0438	0	-1.25005	8.20346	0	0	0	0.00566283	0.00566283	3.20676e-05
14	-48	0.00566288			C	0.01	5	0.0165563	0.015		-48	-0.400568	6.94375	0	-1.2467	8.13679	0	0	0	0.00566288	0.00566288	3.20682e-05
15	-47	0.00584869			D	0	100	46.5136	50		-47	-0.391765	6.84251	0	-1.24325	8.06901	0	0	0	0.00584869	0.00584869	3.42071e-05
16	-46	0.00648674			Dk	28	45	31.9572	35		-46	-0.382773	6.74016	0	-1.2397	8.00011	0	0	0	0.00648674	0.00648674	4.20778e-05
17	-45	0.00679544			Q	0.15	0.85	0.377751	0.3		-45	-0.373589	6.63675	0	-1.23605	7.93012	0	0	0	0.00679544	0.00679544	4.6178e-05
18	-44	0.00706268						0.571179	0.661353		-44	-0.36421	6.53237	0	-1.23229	7.85904	0	0	0	0.00706268	0.00706268	4.98814e-05
19	-43	0.00762059									-43	-0.354632	6.42708	0	-1.22842	7.78688	0	0	0	0.00762059	0.00762059	5.80733e-05
20	-42	0.00820831									-42	-0.344852	6.32096	0	-1.22444	7.71368	0	0	0	0.00820831	0.00820831	6.73763e-05
21	-41	0.00867047									-41	-0.334867	6.2141	0	-1.22034	7.63943	0	0	0	0.00867047	0.00867047	7.51771e-05
22	-40	0.00904204									-40	-0.324674	6.10658	0	-1.21612	7.56416	0	0	0	0.00904204	0.00904204	8.17585e-05
23	-39	0.00951955									-39	-0.314268	5.99847	0	-1.21178	7.48789	0	0	0	0.00951955	0.00951955	9.06219e-05
24	-38	0.0101412									-38	-0.303647	5.88987	0	-1.20732	7.41065	0	0	0	0.0101412	0.0101412	0.000102844
25	-37	0.0104727									-37	-0.292807	5.78086	0	-1.20273	7.33246	0	0	0	0.0104727	0.0104727	0.000109677
26	-36	0.0103583									-36	-0.281745	5.67154	0	-1.198	7.25334	0	0	0	0.0103583	0.0103583	0.000107294
27	-35	0.0109906									-35	-0.270458	5.56199	0	-1.19314	7.17333	0	0	0	0.0109906	0.0109906	0.000120793
28	-34	0.0116894									-34	-0.258941	5.4523	0	-1.18814	7.09244	0	0	0	0.0116894	0.0116894	0.000136643
29	-33	0.0111401									-33	-0.247192	5.34257	0	-1.183	7.01072	0	0	0	0.0111401	0.0111401	0.000124101
30	-32	0.0114678									-32	-0.235208	5.23288	0	-1.1777	6.92819	0	0	0	0.0114678	0.0114678	0.00013151
31	-31	0.0132254									-31	-0.222984	5.12333	0	-1.17226	6.84489	0	0	0	0.0132254	0.0132254	0.00017491
32	-30	0.0131091									-30	-0.210519	5.01401	0	-1.16666	6.76085	0	0	0	0.0131091	0.0131091	0.00017185
33	-29	0.0129957									-29	-0.197807	4.90501	0	-1.1609	6.67612	0	0	0	0.0129957	0.0129957	0.000168887
34	-28	0.0158914									-28	-0.184846	4.79642	0	-1.15498	6.59072	0	0	0	0.0158914	0.0158914	0.000252535
35	-27	0.017845									-27	-0.171633	4.68833	0	-1.14889	6.50471	0	0	0	0.017845	0.017845	0.000318443
36	-26	0.0175295									-26	-0.158165	4.58082	0	-1.14262	6.41811	0	0	0	0.0175295	0.0175295	0.000307285
37	-25	0.0211059									-25	-0.144437	4.47397	0	-1.13618	6.33097	0	0	0	0.0211059	0.0211059	0.000445457
38	-24	0.0270359									-24	-0.130448	4.36787	0	-1.12956	6.24334	0	0	0	0.0270359	0.0270359	0.00073094
39	-23	0.0286773									-23	-0.116194	4.2626	0	-1.12275	6.15526	0	0	0	0.0286773	0.0286773	0.00082239
40	-22	0.032617									-22	-0.101671	4.15824	0	-1.11575	6.06677	0	0	0	0.032617	0.032617	0.00106387
41	-21	0.043646									-21	-0.0868771	4.05486	0	-1.10855	5.97792	0	0	0	0.043646	0.043646	0.00190497
42	-20	0.051344									-20	-0.071809	3.95252	0	-1.10115	5.88876	0	0	0	0.051344	0.051344	0.0026362
43	-19	0.0574387									-19	-0.0564638	3.85131	0	-1.09354	5.79933	0	0	0	0.0574387	0.0574387	0.00329921
44	-18	0.0736764									-18	-0.0408386	3.75128	0	-1.08572	5.70969	0	0	0	0.0736764	0.0736764	0.00542821
45	-17	0.0912153									-17	-0.0249306	3.6525	0	-1.07768	5.61987	0	0	0	0.0912153	0.0912153	0.00832022
46	-16	0.103273									-16	-0.00873702	3.55502	0	-1.06942	5.52994	0	0	0	0.103273	0.103273	0.0106652
47	-15	0.123808									-15	0.00774467	3.45889	0.026788	-1.06093	5.43993	0	0	0.026788	0.123808	0.0970197	0.00941283
48	-14	0.151181									-14	0.024517	3.36418	0.0824797	-1.05221	5.3499	0	0	0.0824797	0.151181	0.068701	0.00471983
49	-13	0.171823									-13	0.0415826	3.27092	0.136013	-1.04325	5.2599	0	0	0.136013	0.171823	0.0358103	0.00128237
50	-12	0.196009									-12	0.0589436	3.17915	0.187391	-1.03404	5.16998	0	0	0.187391	0.196009	0.00861861	7.42805e-05
51	-11	0.23094									-11	0.0766024	3.08892	0.236619	-1.02458	5.08018	0	0	0.236619	0.23094	0.00567913	3.22525e-05
52	-10	0.260858									-10	0.0945612	3.00027	0.283709	-1.01486	4.99056	0	0	0.283709	0.260858	0.0228509	0.000522163
53	-9	0.287937									-9	0.112822	2.91321	0.328674	-1.00488	4.90116	0	0	0.328674	0.287937	0.0407371	0.00165951
54	-8	0.326636									-8	0.131386	2.82779	0.371533	-0.994625	4.81203	0	0	0.371533	0.326636	0.0448968	0.00201572
55	-7	0.364765									-7	0.150257	2.74401	0.412306	-0.984095	4.72322	0	0	0.412306	0.364765	0.0475416	0.00226021
56	-6	0.394168									-6	0.169434	2.66192	0.45102	-0.973281	4.63477	0	0	0.45102	0.394168	0.0568518	0.00323213
57	-5	0.431906									-5	0.18892	2.58151	0.487701	-0.962177	4.54674	0	0	0.487701	0.431906	0.0557951	0.00311309
58	-4	0.475053									-4	0.208717	2.50281	0.522379	-0.950777	4.45916	0	0	0.522379	0.475053	0.0473261	0.00223976
59	-3	0.506931									-3	0.228825	2.42582	0.555089	-0.939074	4.37208	0	0	0.555089	0.506931	0.0481586	0.00231925
60	-2	0.53992									-2	0.249245	2.35056	0.585866	-0.92706	4.28555	0	0	0.585866	0.53992	0.0459456	0.002111
61	-1	0.582746									-1	0.269979	2.27702	0.614748	-0.914728	4.1996	0	0	0.614748	0.582746	0.0320021	0.00102413
62	0	0.616848									0	0.291027	2.2052	0.641774	-0.902073	4.11428	0	0	0.641774	0.616848	0.0249261	0.000621311
63	1	0.643821									1	0.31239	2.13511	0.666987	-0.889086	4.02962	0	0	0.666987	0.643821	0.0231655	0.000536642
64	2	0.680512									2	0.334068	2.06674	0.69043	-0.87576	3.94566	0	0	0.69043	0.680512	0.00991796	9.8366e-05
65	3	0.714706									3	0.356061	2.00007	0.712147	-0.862089	3.86245	0	0	0.712147	0.714706	0.00255862	6.54652e-06
66	4	0.736498									4	0.378369	1.93511	0.732186	-0.848064	3.78001	0	0	0.732186	0.736498	0.00431216	1.85948e-05
67	5	0.763083									5	0.400993	1.87184	0.750593	-0.833679	3.69838	0	0	0.750593	0.763083	0.0124905	0.000156012
68	6	0.793535									6	0.423931	1.81024	0.767416	-0.818926	3.61759	0	0	0.767416	0.793535	0.026119	0.000682203
69	7	0.811428									7	0.447183	1.7503	0.782703	-0.803797	3.53768	0	0	0.782703	0.811428	0.0287244	0.000825094
70	8	0.826922									8	0.470749	1.692	0.796506	-0.788286	3.45866	0	0	0.796506	0.826922	0.0304161	0.000925137
71	9	0.849663									9	0.494627	1.63532	0.808872	-0.772384	3.38057	0	0	0.808872	0.849663	0.0407915	0.00166395
72	10	0.864214									10	0.518816	1.58024	0.819852	-0.756083	3.30344	0	0	0.819852	0.864214	0.044362	0.00196798
73	11	0.87018									11	0.543314	1.52673	0.829496	-0.739377	3.22729	0	0	0.829496	0.87018	0.0406844	0.00165522
74	12	0.882549									12	0.568121	1.47478	0.837854	-0.722257	3.15213	0	0	0.837854	0.882549	0.0446946	0.00199761
75	13	0.893256									13	0.593233	1.42436	0.844976	-0.704717	3.078	0	0	0.844976	0.893256	0.0482801	0.00233097
76	14	0.892725									14	0.618649	1.37544	0.850912	-0.686747	3.00491	0	0	0.850912	0.892725	0.0418135	0.00174837
77	15	0.894285									15	0.644366	1.32799	0.855711	-0.668342	2.93288	0	0	0.855711	0.894285	0.038574	0.00148795
78	16	0.900007									16	0.670382	1.28199	0.859421	-0.649492	2.86192	0	0	0.859421	0.900007	0.0405866	0.00164727
79	17	0.896318									17	0.696693	1.2374	0.862091	-0.630191	2.79205	0	0	0.862091	0.896318	0.0342267	0.00117147
80	18	0.888887									18	0.723298	1.19421	0.863768	-0.61043	2.72328	0	0	0.863768	0.888887	0.0251184	0.000630935
81	19	0.888369									19	0.750191	1.15237	0.8645	-0.590204	2.65562	0	0	0.8645	0.888369	0.0238687	0.000569715
82	20	0.883726									20	0.777369	1.11187	0.864332	-0.569503	2.58909	0	0	0.864332	0.883726	0.0193934	0.000376104
83	21	0.870966									21	0.80483	1.07266	0.86331	-0.548321	2.52368	0	0	0.86331	0.870966	0.00765645	5.86212e-05
84	22	0.863699									22	0.832567	1.03472	0.861477	-0.526651	2.45941	0	0	0.861477	0.863699	0.00222157	4.93535e-06
85	23	0.858952									23	0.860577	0.998026	0.858878	-0.504485	2.39627	0	0	0.858878	0.858952	7.38329e-05	5.45129e-09
86	24	0.845465									24	0.888856	0.962535	0.855555	-0.481817	2.33429	0	0	0.855555	0.845465	0.0100892	0.000101793
87	25	0.832868									25	0.917397	0.928221	0.851548	-0.458639	2.27345	0	0	0.851548	0.832868	0.0186801	0.000348945
88	26	0.827555									26	0.946197	0.895055	0.846899	-0.434945	2.21375	0	0	0.846899	0.827555	0.0193435	0.000374169
89	27	0.817077									27	0.975249	0.863006	0.841646	-0.410728	2.15521	0	0	0.841646	0.817077	0.0245681	0.000603592
90	28	0.80245									28	1.00455	0.832043	0.835827	-0.385982	2.0978	0	0	0.835827	0.80245	0.033377	0.00111403
91	29	0.795882									29	1.03409	0.802137	0.82948	-0.360701	2.04154	0	0	0.82948	0.795882	0.0335978	0.00112881
92	30	0.790133									30	1.06386	0.773259	0.822641	-0.334879	1.98642	0	0	0.822641	0.790133	0.0325082	0.00105678
93	31	0.777519									31	1.09386	0.745379	0.815343	-0.30851	1.93244	0	0	0.815343	0.777519	0.0378245	0.00143069
94	32	0.76976									32	1.12409	0.718468	0.807622	-0.281589	1.87958	0	0	0.807622	0.76976	0.0378617	0.00143351
95	33	0.768358									33	1.15453	0.692499	0.799508	-0.25411	1.82784	0	0	0.799508	0.768358	0.0311497	0.000970302
96	34	0.761234									34	1.18517	0.667443	0.791034	-0.226069	1.77722	0	0	0.791034	0.761234	0.0297993	0.000887997
97	35	0.753699									35	1.21602	0.643272	0.782229	-0.197461	1.7277	0	0	0.782229	0.753699	0.0285299	0.000813957
98	36	0.754948									36	1.24705	0.61996	0.773123	-0.168282	1.67927	0	0	0.773123	0.754948	0.0181755	0.000330347
99	37	0.754956									37	1.27828	0.59748	0.763744	-0.138527	1.63194	0	0	0.763744	0.754956	0.00878779	7.72253e-05
100	38	0.750146									38	1.30967	0.575806	0.754118	-0.108194	1.58567	0	0	0.754118	0.750146	0.00397186	1.57757e-05
101	39	0.752252									39	1.34124	0.554912	0.744271	-0.0772788	1.54047	0	0	0.744271	0.752252	0.00798126	6.37005e-05
102	40	0.758561									40	1.37297	0.534775	0.734227	-0.045779	1.49631	0	0	0.734227	0.758561	0.0243339	0.00059214
103	41	0.758973									41	1.40484	0.515368	0.724011	-0.0136922	1.45319	0	0	0.724011	0.758973	0.0349613	0.0012223
104	42	0.761307									42	1.43686	0.49667	0.713646	0.0189834	1.4111	0.0267875	0.017716	0.731362	0.761307	0.0299453	0.000896721
105	43	0.771174									43	1.46901	0.478655	0.703151	0.0522493	1.37002	0.0715826	0.0473414	0.750493	0.771174	0.0206817	0.000427735
106	44	0.77787									44	1.50129	0.461303	0.692549	0.0861065	1.32993	0.114516	0.0757354	0.768284	0.77787	0.00958552	9.18822e-05
107	45	0.78124									45	1.53368	0.44459	0.681859	0.120555	1.29083	0.155616	0.102917	0.784776	0.78124	0.00353523	1.24978e-05
108	46	0.791484									46	1.56618	0.428494	0.671098	0.155596	1.25269	0.194913	0.128906	0.800005	0.791484	0.00852076	7.26033e-05
109	47	0.803162									47	1.59877	0.412996	0.660286	0.191227	1.2155	0.232437	0.153723	0.814009	0.803162	0.0108467	0.00011765
110	48	0.808926									48	1.63145	0.398075	0.649439	0.227449	1.17925	0.268218	0.177387	0.826826	0.808926	0.0178992	0.00032038
111	49	0.817472									49	1.6642	0.383711	0.638572	0.264258	1.14391	0.302288	0.199919	0.838492	0.817472	0.0210201	0.000441845
112	50	0.830986									50	1.69702	0.369884	0.627702	0.301653	1.10948	0.33468	0.221341	0.849043	0.830986	0.0180569	0.000326053
113	51	0.839657									51	1.7299	0.356576	0.616841	0.339631	1.07594	0.365424	0.241674	0.858516	0.839657	0.018859	0.000355661
114	52	0.846192									52	1.76283	0.343768	0.606005	0.378189	1.04327	0.394554	0.26094	0.866944	0.846192	0.0207519	0.000430643
115	53	0.858088									53	1.79579	0.331444	0.595204	0.417321	1.01146	0.422103	0.279159	0.874363	0.858088	0.0162749	0.000264872
116	54	0.868494									54	1.82878	0.319586	0.584451	0.457024	0.980483	0.448104	0.296355	0.880807	0.868494	0.0123128	0.000151604
117	55	0.873713									55	1.86178	0.308177	0.573758	0.497292	0.950331	0.472591	0.31255	0.886308	0.873713	0.0125945	0.000158622
118	56	0.881925									56	1.89479	0.297201	0.563135	0.538118	0.920984	0.495598	0.327765	0.8909	0.881925	0.00897457	8.05429e-05
119	57	0.891754									57	1.9278	0.286643	0.552591	0.579496	0.892426	0.517157	0.342023	0.894614	0.891754	0.00286069	8.18353e-06
120	58	0.896198									58	1.96079	0.276488	0.542136	0.621418	0.864642	0.537304	0.355348	0.897483	0.896198	0.00128547	1.65244e-06
121	59	0.900272									59	1.99376	0.266721	0.531777	0.663877	0.837615	0.556073	0.36776	0.899538	0.900272	0.000734227	5.39089e-07
122	60	0.907461									60	2.02669	0.257327	0.521524	0.706862	0.811328	0.573497	0.379284	0.900808	0.907461	0.00665324	4.42656e-05
123	61	0.910899									61	2.05958	0.248294	0.511383	0.750366	0.785765	0.589612	0.389941	0.901324	0.910899	0.00957475	9.16758e-05
124	62	0.91134									62	2.09242	0.239608	0.501361	0.794377	0.760911	0.60445	0.399755	0.901115	0.91134	0.0102243	0.000104537
125	63	0.914656									63	2.12519	0.231256	0.491463	0.838884	0.736749	0.618047	0.408747	0.900211	0.914656	0.0144451	0.00020866
126	64	0.916628									64	2.15789	0.223226	0.481697	0.883876	0.713264	0.630436	0.416941	0.898638	0.916628	0.0179903	0.00032365
127	65	0.91409									65	2.1905	0.215506	0.472066	0.92934	0.690439	0.641652	0.424359	0.896425	0.91409	0.0176655	0.00031207
128	66	0.913053									66	2.22302	0.208085	0.462576	0.975263	0.668259	0.651729	0.431023	0.893598	0.913053	0.0194548	0.000378488
129	67	0.912905									67	2.25543	0.20095	0.45323	1.02163	0.64671	0.660699	0.436955	0.890185	0.912905	0.02272	0.000516198
130	68	0.907964									68	2.28773	0.194093	0.444032	1.06843	0.625775	0.668598	0.442179	0.886212	0.907964	0.0217525	0.00047317
131	69	0.902352									69	2.31991	0.187501	0.434986	1.11565	0.60544	0.675458	0.446716	0.881703	0.902352	0.0206489	0.000426378
132	70	0.899397									70	2.35196	0.181166	0.426095	1.16327	0.58569	0.681313	0.450588	0.876683	0.899397	0.0227137	0.000515911
133	71	0.892802									71	2.38387	0.175077	0.41736	1.21127	0.56651	0.686195	0.453817	0.871178	0.892802	0.0216244	0.000467615
134	72	0.883016									72	2.41563	0.169225	0.408785	1.25963	0.547887	0.690138	0.456425	0.86521	0.883016	0.0178066	0.000317075
135	73	0.87655									73	2.44724	0.163601	0.400371	1.30835	0.529807	0.693173	0.458432	0.858803	0.87655	0.0177469	0.000314952
136	74	0.86931									74	2.47867	0.158197	0.392119	1.3574	0.512254	0.695334	0.459861	0.85198	0.86931	0.0173304	0.000300342
137	75	0.856659									75	2.50993	0.153004	0.384031	1.40676	0.495216	0.696652	0.460733	0.844763	0.856659	0.0118956	0.000141506
138	76	0.845986									76	2.54101	0.148015	0.376107	1.45642	0.47868	0.697158	0.461067	0.837174	0.845986	0.008812	7.76514e-05
139	77	0.838483									77	2.5719	0.14322	0.368348	1.50635	0.462631	0.696884	0.460886	0.829234	0.838483	0.00924856	8.55359e-05
140	78	0.825462									78	2.60259	0.138614	0.360754	1.55653	0.447058	0.695861	0.460209	0.820964	0.825462	0.00449807	2.02326e-05
141	79	0.810662									79	2.63308	0.134188	0.353326	1.60695	0.431948	0.694118	0.459057	0.812383	0.810662	0.00172112	2.96226e-06
142	80	0.801935									80	2.66335	0.129935	0.346063	1.65758	0.417288	0.691688	0.45745	0.803513	0.801935	0.00157769	2.48911e-06
143	81	0.79112									81	2.6934	0.12585	0.338965	1.7084	0.403066	0.688598	0.455406	0.794371	0.79112	0.00325095	1.05687e-05
144	82	0.774247									82	2.72322	0.121926	0.332031	1.75939	0.38927	0.684878	0.452946	0.784977	0.774247	0.0107301	0.000115135
145	83	0.762644									83	2.75282	0.118156	0.32526	1.81053	0.375889	0.680558	0.450089	0.775349	0.762644	0.0127054	0.000161428
146	84	0.75473									84	2.78217	0.114534	0.318652	1.86179	0.362911	0.675665	0.446853	0.765505	0.75473	0.0107757	0.000116116
147	85	0.739329									85	2.81128	0.111055	0.312205	1.91316	0.350325	0.670228	0.443257	0.755463	0.739329	0.0161336	0.000260294
148	86	0.724289									86	2.84013	0.107713	0.305919	1.96461	0.33812	0.664273	0.439319	0.745238	0.724289	0.0209483	0.000438832
149	87	0.717477									87	2.86873	0.104503	0.29979	2.01611	0.326286	0.657829	0.435057	0.734847	0.717477	0.0173704	0.00030173
150	88	0.706464									88	2.89707	0.101419	0.293819	2.06765	0.314811	0.65092	0.430488	0.724307	0.706464	0.0178427	0.000318364
151	89	0.689639									89	2.92514	0.0984576	0.288002	2.1192	0.303687	0.643575	0.42563	0.713632	0.689639	0.0239935	0.000575688
152	90	0.680981									90	2.95294	0.095613	0.282339	2.17075	0.292902	0.635816	0.420499	0.702838	0.680981	0.0218568	0.000477719
153	91	0.674812									91	2.98046	0.0928808	0.276827	2.22225	0.282448	0.627671	0.415112	0.691939	0.674812	0.0171267	0.000293325
154	92	0.659579									92	3.0077	0.0902567	0.271465	2.2737	0.272314	0.619162	0.409484	0.68095	0.659579	0.0213707	0.000456708
155	93	0.647271									93	3.03466	0.0877364	0.26625	2.32508	0.262492	0.610314	0.403633	0.669883	0.647271	0.0226117	0.00051129
156	94	0.643515									94	3.06133	0.0853159	0.26118	2.37634	0.252972	0.60115	0.397572	0.658752	0.643515	0.0152368	0.000232161
157	95	0.63299									95	3.0877	0.0829913	0.256252	2.42749	0.243747	0.591692	0.391317	0.64757	0.63299	0.0145797	0.000212568
158	96	0.617881									96	3.11378	0.0807588	0.251465	2.47849	0.234806	0.581964	0.384883	0.636349	0.617881	0.0184673	0.000341041
159	97	0.612627									97	3.13957	0.0786148	0.246816	2.52932	0.226142	0.571985	0.378284	0.6251	0.612627	0.0124733	0.000155583
160	98	0.607482									98	3.16505	0.0765558	0.242303	2.57996	0.217747	0.561778	0.371533	0.613836	0.607482	0.00635475	4.03829e-05
161	99	0.592759									99	3.19023	0.0745785	0.237923	2.63038	0.209613	0.551362	0.364645	0.602567	0.592759	0.00980803	9.61974e-05
162	100	0.583159									100	3.2151	0.0726797	0.233673	2.68058	0.201731	0.540757	0.357631	0.591304	0.583159	0.00814488	6.63391e-05
163	101	0.580821									101	3.23967	0.0708562	0.229551	2.73052	0.194096	0.529982	0.350505	0.580056	0.580821	0.000764644	5.8468e-07
164	102	0.569834									102	3.26393	0.0691052	0.225554	2.78019	0.186698	0.519056	0.343279	0.568834	0.569834	0.00100007	1.00015e-06
165	103	0.55594									103	3.28788	0.0674237	0.221681	2.82957	0.179532	0.507997	0.335965	0.557646	0.55594	0.00170675	2.913e-06
166	104	0.55201									104	3.31151	0.0658091	0.217927	2.87863	0.17259	0.496822	0.328575	0.546502	0.55201	0.00550831	3.03415e-05
167	105	0.545825									105	3.33483	0.0642586	0.214292	2.92737	0.165865	0.485548	0.321118	0.53541	0.545825	0.0104151	0.000108474
168	106	0.53055									106	3.35784	0.0627698	0.210771	2.97575	0.159351	0.47419	0.313607	0.524378	0.53055	0.00617214	3.80953e-05
169	107	0.521592									107	3.38053	0.0613402	0.207363	3.02377	0.153042	0.462765	0.306051	0.513413	0.521592	0.00817861	6.68896e-05
170	108	0.518103									108	3.40291	0.0599674	0.204064	3.0714	0.146932	0.451286	0.29846	0.502523	0.518103	0.0155797	0.000242726
171	109	0.505162									109	3.42498	0.0586493	0.200873	3.11864	0.141013	0.43977	0.290843	0.491715	0.505162	0.0134462	0.0001808
172	110	0.490849									110	3.44672	0.0573837	0.197786	3.16546	0.135282	0.428228	0.28321	0.480996	0.490849	0.00985358	9.7093e-05
173	111	0.486042									111	3.46816	0.0561684	0.194801	3.21185	0.129731	0.416675	0.275569	0.47037	0.486042	0.0156718	0.000245605
174	112	0.477409									112	3.48927	0.0550016	0.191916	3.25779	0.124355	0.405123	0.267929	0.459845	0.477409	0.0175648	0.000308521
175	113	0.460668									113	3.51008	0.0538812	0.189127	3.30328	0.119149	0.393583	0.260297	0.449425	0.460668	0.0112431	0.000126407
176	114	0.451233									114	3.53057	0.0528054	0.186433	3.34829	0.114108	0.382068	0.252682	0.439115	0.451233	0.012118	0.000146845
177	115	0.445891									115	3.55074	0.0517726	0.183831	3.39283	0.109227	0.370588	0.245089	0.428921	0.445891	0.01697	0.000287981
178	116	0.430926									116	3.57061	0.0507808	0.181318	3.43686	0.1045	0.359153	0.237527	0.418846	0.430926	0.0120807	0.000145943
179	117	0.416355									117	3.59016	0.0498286	0.178893	3.48039	0.0999239	0.347774	0.230001	0.408894	0.416355	0.00746109	5.56678e-05
180	118	0.410963									118	3.60941	0.0489144	0.176552	3.5234	0.0954927	0.336459	0.222518	0.39907	0.410963	0.011893	0.000141444
181	119	0.400545									119	3.62835	0.0480366	0.174294	3.56588	0.0912023	0.325217	0.215083	0.389377	0.400545	0.0111685	0.000124736
182	120	0.383484									120	3.64698	0.0471938	0.172115	3.60783	0.0870484	0.314056	0.207702	0.379817	0.383484	0.0036673	1.34491e-05
183	121	0.374738									121	3.66531	0.0463847	0.170014	3.64923	0.0830268	0.302984	0.200379	0.370394	0.374738	0.00434412	1.88714e-05
184	122	0.368568									122	3.68333	0.0456078	0.167989	3.69009	0.0791332	0.292008	0.193121	0.361109	0.368568	0.00745857	5.56302e-05
185	123	0.353178									123	3.70106	0.0448619	0.166037	3.73038	0.0753638	0.281136	0.18593	0.351967	0.353178	0.00121117	1.46694e-06
186	124	0.340191									124	3.71849	0.0441458	0.164156	3.77011	0.0717147	0.270372	0.178811	0.342967	0.340191	0.00277622	7.70738e-06
187	125	0.33545									125	3.73562	0.0434583	0.162343	3.80927	0.068182	0.259724	0.171769	0.334112	0.33545	0.00133765	1.78931e-06
188	126	0.324677									126	3.75245	0.0427982	0.160598	3.84785	0.0647623	0.249196	0.164806	0.325404	0.324677	0.000727513	5.29275e-07
189	127	0.309482									127	3.769	0.0421644	0.158918	3.88586	0.0614518	0.238793	0.157926	0.316844	0.309482	0.00736244	5.42056e-05
190	128	0.303047									128	3.78526	0.041556	0.1573	3.92328	0.0582472	0.22852	0.151132	0.308432	0.303047	0.0053856	2.90047e-05
191	129	0.297033									129	3.80123	0.0409718	0.155743	3.96012	0.0551452	0.218381	0.144427	0.30017	0.297033	0.00313751	9.84399e-06
192	130	0.282967									130	3.81691	0.040411	0.154245	3.99637	0.0521425	0.20838	0.137813	0.292058	0.282967	0.00909124	8.26507e-05
193	131	0.273496									131	3.83232	0.0398725	0.152804	4.03203	0.049236	0.198521	0.131292	0.284097	0.273496	0.0106012	0.000112386
194	132	0.270155									132	3.84745	0.0393556	0.151419	4.0671	0.0464227	0.188805	0.124867	0.276286	0.270155	0.00613089	3.75879e-05
195	133	0.259839									133	3.86231	0.0388593	0.150087	4.10157	0.0436996	0.179237	0.118539	0.268626	0.259839	0.00878708	7.72127e-05
196	134	0.24823									134	3.87689	0.0383829	0.148806	4.13546	0.0410639	0.169818	0.11231	0.261116	0.24823	0.0128858	0.000166043
197	135	0.244992									135	3.8912	0.0379255	0.147576	4.16875	0.0385128	0.16055	0.10618	0.253756	0.244992	0.00876397	7.68071e-05
198	136	0.239285									136	3.90525	0.0374863	0.146393	4.20146	0.0360437	0.151436	0.100153	0.246546	0.239285	0.0072606	5.27164e-05
199	137	0.227838									137	3.91903	0.0370647	0.145258	4.23357	0.0336539	0.142476	0.094227	0.239485	0.227838	0.0116472	0.000135657
200	138	0.223018									138	3.93256	0.03666	0.144168	4.2651	0.0313409	0.133672	0.0884044	0.232572	0.223018	0.00955376	9.12743e-05
201	139	0.221023									139	3.94583	0.0362714	0.143121	4.29604	0.0291024	0.125025	0.0826856	0.225806	0.221023	0.0047838	2.28847e-05
202	140	0.212114									140	3.95885	0.0358984	0.142116	4.3264	0.0269358	0.116535	0.0770709	0.219187	0.212114	0.00707295	5.00266e-05
203	141	0.205536									141	3.97161	0.0355402	0.141152	4.35618	0.024839	0.108203	0.0715606	0.212713	0.205536	0.00717708	5.15105e-05
204	142	0.205352									142	3.98413	0.0351964	0.140227	4.38539	0.0228097	0.10003	0.0661549	0.206382	0.205352	0.00102958	1.06003e-06
205	143	0.200427									143	3.99641	0.0348663	0.13934	4.41402	0.0208458	0.092014	0.0608537	0.200194	0.200427	0.000232684	5.41417e-08
206	144	0.193349									144	4.00845	0.0345495	0.13849	4.44209	0.0189452	0.0841563	0.055657	0.194147	0.193349	0.000797855	6.36573e-07
207	145	0.19324									145	4.02025	0.0342452	0.137674	4.4696	0.0171058	0.0764562	0.0505646	0.188239	0.19324	0.00500058	2.50058e-05
208	146	0.192442									146	4.03181	0.0339532	0.136893	4.49654	0.0153258	0.0689132	0.0455759	0.182469	0.192442	0.00997342	9.9469e-05
209	147	0.18689									147	4.04315	0.0336728	0.136144	4.52294	0.0136032	0.0615263	0.0406906	0.176835	0.18689	0.0100549	0.0001011
210	148	0.18617									148	4.05426	0.0334037	0.135427	4.54879	0.0119361	0.054295	0.0359081	0.171335	0.18617	0.014835	0.000220076
211	149	0.188534									149	4.06515	0.0331453	0.134741	4.57409	0.0103229	0.0472179	0.0312277	0.165968	0.188534	0.0225655	0.000509204
											150	4.07582	0.0328972	0.134083	4.59886	0.00876176	0.0402941	0.0266486	0.160732
											151	4.08628	0.0326591	0.133454	4.62311	0.00725103	0.0335223	0.0221701	0.155624
											152	4.09652	0.0324304	0.132852	4.64682	0.00578911	0.026901	0.017791	0.150643
											153	4.10655	0.032211	0.132276	4.67003	0.00437442	0.0204287	0.0135106	0.145786
											154	4.11637	0.0320003	0.131725	4.69272	0.00300546	0.0141038	0.00932758	0.141053
											155	4.12599	0.031798	0.131198	4.71491	0.00168076	0.00792464	0.00524098	0.136439
											156	4.13542	0.0316038	0.130695	4.7366	0.000398898	0.00188942	0.00124957	0.131945
											157	4.14464	0.0314174	0.130214	4.75781	-0.000841503	0	0	0.130214
											158	4.15368	0.0312384	0.129754	4.77853	-0.00204177	0	0	0.129754
											159	4.16252	0.0310666	0.129316	4.79878	-0.00320321	0	0	0.129316
											160	4.17118	0.0309017	0.128897	4.81856	-0.00432705	0	0	0.128897
											161	4.17966	0.0307434	0.128497	4.83788	-0.0054145	0	0	0.128497
											162	4.18795	0.0305914	0.128115	4.85675	-0.00646675	0	0	0.128115
											163	4.19607	0.0304455	0.127751	4.87518	-0.00748492	0	0	0.127751
											164	4.20402	0.0303054	0.127404	4.89317	-0.00847011	0	0	0.127404
											165	4.21179	0.0301709	0.127074	4.91073	-0.00942338	0	0	0.127074
											166	4.2194	0.0300418	0.126759	4.92787	-0.0103458	0	0	0.126759
											167	4.22685	0.0299179	0.126458	4.9446	-0.0112382	0	0	0.126458
											168	4.23413	0.029799	0.126173	4.96092	-0.0121018	0	0	0.126173
											169	4.24125	0.0296847	0.125901	4.97684	-0.0129374	0	0	0.125901
											170	4.24822	0.0295751	0.125642	4.99237	-0.0137458	0	0	0.125642
											171	4.25504	0.0294699	0.125396	5.00751	-0.0145281	0	0	0.125396
											172	4.26171	0.0293688	0.125161	5.02228	-0.015285	0	0	0.125161
											173	4.26823	0.0292718	0.124939	5.03669	-0.0160173	0	0	0.124939
											174	4.27461	0.0291787	0.124728	5.05073	-0.0167259	0	0	0.124728
											175	4.28085	0.0290893	0.124527	5.06442	-0.0174115	0	0	0.124527
											176	4.28695	0.0290035	0.124337	5.07776	-0.0180748	0	0	0.124337
											177	4.29291	0.0289211	0.124156	5.09076	-0.0187166	0	0	0.124156
											178	4.29875	0.0288421	0.123985	5.10343	-0.0193376	0	0	0.123985
											179	4.30445	0.0287661	0.123822	5.11578	-0.0199384	0	0	0.123822
											180	4.31002	0.0286933	0.123669	5.12781	-0.0205197	0	0	0.123669
											181	4.31547	0.0286233	0.123523	5.13952	-0.0210822	0	0	0.123523
											182	4.3208	0.0285562	0.123385	5.15094	-0.0216263	0	0	0.123385
											183	4.32601	0.0284917	0.123255	5.16206	-0.0221528	0	0	0.123255
											184	4.3311	0.0284298	0.123132	5.17288	-0.0226622	0	0	0.123132
											185	4.33607	0.0283704	0.123016	5.18343	-0.0231551	0	0	0.123016
											186	4.34093	0.0283133	0.122906	5.19369	-0.0236319	0	0	0.122906
											187	4.34569	0.0282586	0.122803	5.20369	-0.0240933	0	0	0.122803
											188	4.35033	0.028206	0.122706	5.21342	-0.0245397	0	0	0.122706
											189	4.35487	0.0281556	0.122614	5.22289	-0.0249715	0	0	0.122614
											190	4.3593	0.0281071	0.122527	5.23211	-0.0253894	0	0	0.122527
											191	4.36364	0.0280606	0.122446	5.24109	-0.0257936	0	0	0.122446
											192	4.36787	0.028016	0.12237	5.24982	-0.0261847	0	0	0.12237
											193	4.37201	0.0279731	0.122299	5.25832	-0.0265631	0	0	0.122299
											194	4.37605	0.027932	0.122232	5.26659	-0.0269292	0	0	0.122232
											195	4.38	0.0278925	0.122169	5.27464	-0.0272834	0	0	0.122169
											196	4.38386	0.0278546	0.122111	5.28247	-0.0276261	0	0	0.122111
											197	4.38763	0.0278182	0.122056	5.29008	-0.0279577	0	0	0.122056
											198	4.39131	0.0277833	0.122005	5.29749	-0.0282784	0	0	0.122005
											199	4.39491	0.0277497	0.121958	5.3047	-0.0285888	0	0	0.121958
											200	4.39842	0.0277175	0.121913	5.31171	-0.028889	0	0	0.121913
											201	4.40185	0.0276866	0.121873	5.31853	-0.0291795	0	0	0.121873
											202	4.40521	0.027657	0.121835	5.32517	-0.0294605	0	0	0.121835
											203	4.40848	0.0276285	0.1218	5.33162	-0.0297324	0	0	0.1218
											204	4.41168	0.0276011	0.121767	5.33789	-0.0299955	0	0	0.121767
											205	4.4148	0.0275749	0.121738	5.34399	-0.03025	0	0	0.121738
														80.1021			45.7526
