# Supplementary material for: Mathematical Optimization Strategy for Effectiveness Profile Estimation in Two-Dose Vaccines and Its Use in Designing Improved Vaccination Strategies Focused on Pandemic Containment
Source: Vaccines (Basel). 2024 Jan 12;12(1):81. doi: 10.3390/vaccines12010081 (PMC10819090; doi:10.3390/vaccines12010081)
Supplement: Supplementary file 1 [file vaccines-12-00081-s001.zip › Supplementary Material SM3.xlsx]

## Sheet: Alternative 1
GENERAL COMMENT: The best fitting with this interaction model (Alternative 1), shows unacceptable differences between the calculated (orange curve) and original
(blue curve) profiles. Therefore, this interaction model was rejected.
	t	E		Parameters		Min	Max	Final	Ref		k	TANH LF1	TANH LF 2	TANH LF	TANH RT1	TANH RT2	TANH RT	RESULT	OBJECTIVE	DEVIATION	DEVIATION ^2
0	-62	0.00346331		LF1	A	2.5	5	3.40325	3		-62	-0.644725	7.17181	0	-0.0517695	7.12378	0	0	0.00346331	0.00346331	1.19945e-05		MEAN DEVIATION ^2
1	-61	0.00346331			B	-2	4	2.57407	2.5		-61	-0.638531	7.10038	0	-0.0517109	7.06563	0	0	0.00346331	0.00346331	1.19945e-05		0.000992805
2	-60	0.00346331			C	-5	5	0.0169824	0.02		-60	-0.632135	7.02692	0	-0.0516481	7.00631	0	0	0.00346331	0.00346331	1.19945e-05
3	-59	0.00350201			D	-100	-40	-43.425	-70		-59	-0.625531	6.95145	0	-0.0515809	6.94585	0	0	0.00350201	0.00350201	1.22641e-05
4	-58	0.00349976		LF2	A	-10	-4.5	-4.50001	-5		-58	-0.618713	6.87395	0	-0.051509	6.88424	0	0	0.00349976	0.00349976	1.22483e-05
5	-57	0.00364166			B	-5	5.4	4.49864	5		-57	-0.611674	6.79446	0	-0.051432	6.8215	0	0	0.00364166	0.00364166	1.32617e-05
6	-56	0.00386265			C	0.01	5	0.0241812	0.015		-56	-0.604407	6.71298	0	-0.0513495	6.75763	0	0	0.00386265	0.00386265	1.49201e-05
7	-55	0.00390853			D	0	100	33.7186	50		-55	-0.596907	6.62953	0	-0.0512612	6.69265	0	0	0.00390853	0.00390853	1.52766e-05
8	-54	0.00405297		RT1	A	2.5	5	2.94106	3		-54	-0.589165	6.54415	0	-0.0511668	6.62657	0	0	0.00405297	0.00405297	1.64265e-05
9	-53	0.00448562			B	-2	4	2.88846	2.5		-53	-0.581175	6.45688	0	-0.0510656	6.55942	0	0	0.00448562	0.00448562	2.01208e-05
10	-52	0.00476597			C	-5	5	0.0340949	0.02		-52	-0.572929	6.36775	0	-0.0509573	6.49121	0	0	0.00476597	0.00476597	2.27145e-05
11	-51	0.00477919			D	-100	-40	-40	-70		-51	-0.564421	6.27681	0	-0.0508414	6.42195	0	0	0.00477919	0.00477919	2.28406e-05
12	-50	0.0051291		RT2	A	-10	-4.5	-4.57087	-5		-50	-0.555641	6.18412	0	-0.0507173	6.35168	0	0	0.0051291	0.0051291	2.63076e-05
13	-49	0.00566283			B	-5	5.4	4.58992	5		-49	-0.546583	6.08973	0	-0.0505845	6.28042	0	0	0.00566283	0.00566283	3.20676e-05
14	-48	0.00566288			C	0.01	5	0.0181847	0.015		-48	-0.537238	5.99372	0	-0.0504423	6.20819	0	0	0.00566288	0.00566288	3.20682e-05
15	-47	0.00584869			D	0	100	55.6502	50		-47	-0.527599	5.89615	0	-0.05029	6.13502	0	0	0.00584869	0.00584869	3.42071e-05
16	-46	0.00648674			Dk	28	45	28	35		-46	-0.517657	5.7971	0	-0.050127	6.06096	0	0	0.00648674	0.00648674	4.20778e-05
17	-45	0.00679544									-45	-0.507403	5.69667	0	-0.0499526	5.98601	0	0	0.00679544	0.00679544	4.6178e-05
18	-44	0.00706268									-44	-0.496829	5.59493	0	-0.0497658	5.91024	0	0	0.00706268	0.00706268	4.98814e-05
19	-43	0.00762059									-43	-0.485926	5.49198	0	-0.0495659	5.83366	0	0	0.00762059	0.00762059	5.80733e-05
20	-42	0.00820831									-42	-0.474684	5.38794	0	-0.0493518	5.75632	0	0	0.00820831	0.00820831	6.73763e-05
21	-41	0.00867047									-41	-0.463096	5.28289	0	-0.0491227	5.67826	0	0	0.00867047	0.00867047	7.51771e-05
22	-40	0.00904204									-40	-0.451151	5.17695	0	-0.0488774	5.59952	0	0	0.00904204	0.00904204	8.17585e-05
23	-39	0.00951955									-39	-0.438839	5.07024	0	-0.0486149	5.52014	0	0	0.00951955	0.00951955	9.06219e-05
24	-38	0.0101412									-38	-0.426152	4.96287	0	-0.0483338	5.44018	0	0	0.0101412	0.0101412	0.000102844
25	-37	0.0104727									-37	-0.413079	4.85497	0	-0.048033	5.35967	0	0	0.0104727	0.0104727	0.000109677
26	-36	0.0103583									-36	-0.399611	4.74665	0	-0.0477109	5.27867	0	0	0.0103583	0.0103583	0.000107294
27	-35	0.0109906									-35	-0.385737	4.63804	0	-0.0473662	5.19722	0	0	0.0109906	0.0109906	0.000120793
28	-34	0.0116894									-34	-0.371447	4.52927	0	-0.0469972	5.11538	0	0	0.0116894	0.0116894	0.000136643
29	-33	0.0111401									-33	-0.356731	4.42046	0	-0.0466022	5.0332	0	0	0.0111401	0.0111401	0.000124101
30	-32	0.0114678									-32	-0.341578	4.31174	0	-0.0461793	4.95072	0	0	0.0114678	0.0114678	0.00013151
31	-31	0.0132254									-31	-0.325977	4.20324	0	-0.0457267	4.86801	0	0	0.0132254	0.0132254	0.00017491
32	-30	0.0131091									-30	-0.309919	4.09509	0	-0.0452423	4.78512	0	0	0.0131091	0.0131091	0.00017185
33	-29	0.0129957									-29	-0.293391	3.9874	0	-0.0447237	4.70209	0	0	0.0129957	0.0129957	0.000168887
34	-28	0.0158914									-28	-0.276384	3.88031	0	-0.0441686	4.619	0	0	0.0158914	0.0158914	0.000252535
35	-27	0.017845									-27	-0.258886	3.77392	0	-0.0435745	4.53588	0	0	0.017845	0.017845	0.000318443
36	-26	0.0175295									-26	-0.240886	3.66836	0	-0.0429386	4.4528	0	0	0.0175295	0.0175295	0.000307285
37	-25	0.0211059									-25	-0.222373	3.56373	0	-0.042258	4.36981	0	0	0.0211059	0.0211059	0.000445457
38	-24	0.0270359									-24	-0.203337	3.46016	0	-0.0415295	4.28696	0	0	0.0270359	0.0270359	0.00073094
39	-23	0.0286773									-23	-0.183765	3.35773	0	-0.0407498	4.20432	0	0	0.0286773	0.0286773	0.00082239
40	-22	0.032617									-22	-0.163647	3.25655	0	-0.0399154	4.12192	0	0	0.032617	0.032617	0.00106387
41	-21	0.043646									-21	-0.142972	3.15671	0	-0.0390222	4.03984	0	0	0.043646	0.043646	0.00190497
42	-20	0.051344									-20	-0.121729	3.0583	0	-0.0380664	3.95811	0	0	0.051344	0.051344	0.0026362
43	-19	0.0574387									-19	-0.0999067	2.9614	0	-0.0370435	3.87679	0	0	0.0574387	0.0574387	0.00329921
44	-18	0.0736764									-18	-0.0774939	2.86609	0	-0.0359488	3.79593	0	0	0.0736764	0.0736764	0.00542821
45	-17	0.0912153									-17	-0.0544802	2.77243	0	-0.0347772	3.71558	0	0	0.0912153	0.0912153	0.00832022
46	-16	0.103273									-16	-0.0308548	2.6805	0	-0.0335236	3.63579	0	0	0.103273	0.103273	0.0106652
47	-15	0.123808									-15	-0.0066072	2.59035	0	-0.032182	3.5566	0	0	0.123808	0.123808	0.0153284
48	-14	0.151181									-14	0.018273	2.50202	0.0457195	-0.0307464	3.47806	0	0.0457195	0.151181	0.105461	0.0111221
49	-13	0.171823									-13	0.043796	2.41557	0.105792	-0.0292104	3.40021	0	0.105792	0.171823	0.0660311	0.0043601
50	-12	0.196009									-12	0.0699717	2.33103	0.163106	-0.0275668	3.3231	0	0.163106	0.196009	0.032903	0.00108261
51	-11	0.23094									-11	0.0968097	2.24845	0.217671	-0.0258082	3.24676	0	0.217671	0.23094	0.0132686	0.000176057
52	-10	0.260858									-10	0.12432	2.16783	0.269503	-0.0239268	3.17123	0	0.269503	0.260858	0.0086456	7.47464e-05
53	-9	0.287937									-9	0.15251	2.08921	0.318625	-0.0219139	3.09654	0	0.318625	0.287937	0.0306884	0.000941776
54	-8	0.326636									-8	0.18139	2.01259	0.365065	-0.0197605	3.02274	0	0.365065	0.326636	0.0384291	0.00147679
55	-7	0.364765									-7	0.210968	1.938	0.408857	-0.0174568	2.94986	0	0.408857	0.364765	0.0440919	0.0019441
56	-6	0.394168									-6	0.241252	1.86543	0.450039	-0.0149926	2.87791	0	0.450039	0.394168	0.0558715	0.00312163
57	-5	0.431906									-5	0.27225	1.79489	0.488657	-0.0123569	2.80695	0	0.488657	0.431906	0.0567514	0.00322072
58	-4	0.475053									-4	0.303967	1.72636	0.524757	-0.00953774	2.73698	0	0.524757	0.475053	0.0497038	0.00247047
59	-3	0.506931									-3	0.336411	1.65985	0.558392	-0.00652267	2.66803	0	0.558392	0.506931	0.0514612	0.00264825
60	-2	0.53992									-2	0.369588	1.59533	0.589617	-0.00329828	2.60014	0	0.589617	0.53992	0.0496962	0.00246971
61	-1	0.582746									-1	0.403503	1.5328	0.61849	0.000149702	2.5333	0.000379241	0.618635	0.582746	0.0358891	0.00128802
62	0	0.616848									0	0.438161	1.47223	0.645073	0.00383649	2.46756	0.00946675	0.648433	0.616848	0.0315852	0.000997622
63	1	0.643821									1	0.473565	1.4136	0.669429	0.00777828	2.40291	0.0186905	0.675608	0.643821	0.0317867	0.00101039
64	2	0.680512									2	0.509719	1.35687	0.691625	0.0119923	2.33938	0.0280546	0.700276	0.680512	0.0197646	0.000390638
65	3	0.714706									3	0.546626	1.30204	0.711727	0.016497	2.27697	0.0375633	0.722555	0.714706	0.00784927	6.1611e-05
66	4	0.736498									4	0.584287	1.24905	0.729804	0.0213118	2.21571	0.0472208	0.742562	0.736498	0.0060643	3.67757e-05
67	5	0.763083									5	0.622703	1.19788	0.745925	0.0264576	2.15559	0.0570317	0.760415	0.763083	0.00266787	7.11752e-06
68	6	0.793535									6	0.661875	1.1485	0.760162	0.0319564	2.09662	0.0670006	0.776231	0.793535	0.0173038	0.000299422
69	7	0.811428									7	0.701802	1.10086	0.772584	0.0378317	2.03881	0.0771319	0.790125	0.811428	0.0213028	0.000453809
70	8	0.826922									8	0.742481	1.05493	0.783264	0.0441085	1.98217	0.0874304	0.802213	0.826922	0.0247084	0.000610507
71	9	0.849663									9	0.783911	1.01067	0.792272	0.0508131	1.92668	0.0979008	0.812609	0.849663	0.0370544	0.00137303
72	10	0.864214									10	0.826088	0.968032	0.79968	0.0579737	1.87236	0.108548	0.821424	0.864214	0.0427899	0.00183097
73	11	0.87018									11	0.869007	0.926986	0.805557	0.0656199	1.8192	0.119376	0.828769	0.87018	0.0414116	0.00171492
74	12	0.882549									12	0.912662	0.887485	0.809974	0.0737833	1.76721	0.13039	0.834752	0.882549	0.0477971	0.00228456
75	13	0.893256									13	0.957047	0.849488	0.813	0.0824972	1.71636	0.141595	0.839479	0.893256	0.0537779	0.00289206
76	14	0.892725									14	1.00215	0.812952	0.814704	0.0917968	1.66667	0.152994	0.843053	0.892725	0.0496723	0.00246734
77	15	0.894285									15	1.04797	0.777835	0.815152	0.101719	1.61811	0.164593	0.845577	0.894285	0.0487079	0.00237246
78	16	0.900007									16	1.0945	0.744095	0.814411	0.112304	1.57069	0.176395	0.847148	0.900007	0.0528597	0.00279414
79	17	0.896318									17	1.14171	0.711688	0.812545	0.123593	1.5244	0.188405	0.847862	0.896318	0.0484553	0.00234792
80	18	0.888887									18	1.18961	0.680575	0.809618	0.135628	1.47922	0.200625	0.847813	0.888887	0.0410735	0.00168703
81	19	0.888369									19	1.23817	0.650711	0.805692	0.148457	1.43515	0.213059	0.847091	0.888369	0.0412777	0.00170385
82	20	0.883726									20	1.28738	0.622058	0.800828	0.162128	1.39217	0.22571	0.845783	0.883726	0.0379427	0.00143965
83	21	0.870966									21	1.33723	0.594574	0.795084	0.17669	1.35027	0.238579	0.843973	0.870966	0.0269934	0.000728644
84	22	0.863699									22	1.3877	0.568219	0.788519	0.192198	1.30944	0.25167	0.841742	0.863699	0.0219568	0.000482102
85	23	0.858952									23	1.43877	0.542954	0.781187	0.208705	1.26965	0.264983	0.839169	0.858952	0.0197835	0.000391385
86	24	0.845465									24	1.49042	0.51874	0.773143	0.226271	1.23091	0.278518	0.836327	0.845465	0.00913859	8.35138e-05
87	25	0.832868									25	1.54264	0.495541	0.764439	0.244955	1.19318	0.292276	0.833288	0.832868	0.000420189	1.76559e-07
88	26	0.827555									26	1.59539	0.473318	0.755127	0.26482	1.15647	0.306255	0.83012	0.827555	0.00256533	6.58089e-06
89	27	0.817077									27	1.64866	0.452036	0.745254	0.285931	1.12074	0.320453	0.826888	0.817077	0.00981081	9.62521e-05
90	28	0.80245									28	1.70243	0.43166	0.734869	0.308354	1.08598	0.334867	0.823653	0.80245	0.0212025	0.000449546
91	29	0.795882									29	1.75666	0.412155	0.724017	0.33216	1.05218	0.349493	0.820471	0.795882	0.0245884	0.000604587
92	30	0.790133									30	1.81134	0.393488	0.712741	0.357419	1.01932	0.364325	0.817397	0.790133	0.0272641	0.000743329
93	31	0.777519									31	1.86644	0.375627	0.701084	0.384205	0.987379	0.379356	0.81448	0.777519	0.0369609	0.00136611
94	32	0.76976									32	1.92192	0.35854	0.689087	0.412592	0.95634	0.394578	0.811766	0.76976	0.0420065	0.00176455
95	33	0.768358									33	1.97777	0.342197	0.676788	0.442656	0.926185	0.409982	0.809299	0.768358	0.0409404	0.00167612
96	34	0.761234									34	2.03396	0.326567	0.664224	0.474474	0.896897	0.425554	0.807115	0.761234	0.0458802	0.002105
97	35	0.753699									35	2.09044	0.311623	0.65143	0.508123	0.868457	0.441283	0.805248	0.753699	0.0515491	0.00265731
98	36	0.754948									36	2.1472	0.297337	0.638442	0.543681	0.840847	0.457153	0.803729	0.754948	0.0487815	0.00237964
99	37	0.754956									37	2.2042	0.283681	0.62529	0.581226	0.814048	0.473146	0.802583	0.754956	0.0476268	0.00226831
100	38	0.750146									38	2.26142	0.27063	0.612006	0.620833	0.788042	0.489243	0.801829	0.750146	0.0516839	0.00267122
101	39	0.752252									39	2.31881	0.258158	0.59862	0.662578	0.762812	0.505422	0.801486	0.752252	0.0492344	0.00242403
102	40	0.758561									40	2.37635	0.246242	0.585157	0.706534	0.738337	0.521661	0.801564	0.758561	0.0430032	0.00184927
103	41	0.758973									41	2.434	0.234859	0.571646	0.75277	0.714602	0.537931	0.802071	0.758973	0.0430983	0.00185746
104	42	0.761307									42	2.49173	0.223985	0.558111	0.801353	0.691587	0.554205	0.803008	0.761307	0.0417014	0.00173901
105	43	0.771174									43	2.54951	0.2136	0.544575	0.852344	0.669275	0.570453	0.804374	0.771174	0.0331992	0.00110219
106	44	0.77787									44	2.6073	0.203682	0.531061	0.9058	0.647649	0.58664	0.806159	0.77787	0.0282893	0.000800287
107	45	0.78124									45	2.66508	0.194211	0.517589	0.961769	0.62669	0.602731	0.808353	0.78124	0.0271125	0.000735089
108	46	0.791484									46	2.7228	0.185169	0.504178	1.0203	0.606382	0.618688	0.810937	0.791484	0.0194536	0.000378441
109	47	0.803162									47	2.78044	0.176536	0.490847	1.08141	0.586707	0.634472	0.81389	0.803162	0.0107282	0.000115095
110	48	0.808926									48	2.83796	0.168295	0.477614	1.14514	0.567649	0.650039	0.817185	0.808926	0.00825869	6.82059e-05
111	49	0.817472									49	2.89532	0.160429	0.464493	1.2115	0.549192	0.665346	0.82079	0.817472	0.00331873	1.1014e-05
112	50	0.830986									50	2.95251	0.152921	0.451499	1.28049	0.531318	0.680347	0.82467	0.830986	0.00631612	3.98933e-05
113	51	0.839657									51	3.00947	0.145755	0.438647	1.3521	0.514013	0.694995	0.828785	0.839657	0.0108722	0.000118204
114	52	0.846192									52	3.0662	0.138917	0.425948	1.4263	0.497259	0.709242	0.83309	0.846192	0.0131026	0.000171679
115	53	0.858088									53	3.12264	0.132392	0.413414	1.50306	0.481043	0.723038	0.837538	0.858088	0.0205504	0.00042232
116	54	0.868494									54	3.17877	0.126167	0.401055	1.58233	0.465348	0.736334	0.842079	0.868494	0.0264152	0.000697761
117	55	0.873713									55	3.23457	0.120227	0.388882	1.66404	0.450159	0.749081	0.846659	0.873713	0.0270547	0.000731955
118	56	0.881925									56	3.29	0.11456	0.376901	1.74809	0.435463	0.761229	0.851222	0.881925	0.0307029	0.000942671
119	57	0.891754									57	3.34504	0.109154	0.365123	1.8344	0.421245	0.772731	0.855712	0.891754	0.0360419	0.00129902
120	58	0.896198									58	3.39965	0.103996	0.353552	1.92284	0.40749	0.783539	0.860069	0.896198	0.036129	0.0013053
121	59	0.900272									59	3.45382	0.0990773	0.342195	2.01328	0.394186	0.793608	0.864234	0.900272	0.0360377	0.00129871
122	60	0.907461									60	3.50751	0.0943853	0.331057	2.10558	0.381318	0.802897	0.868149	0.907461	0.0393122	0.00154545
123	61	0.910899									61	3.5607	0.0899103	0.320144	2.19957	0.368875	0.811365	0.871755	0.910899	0.0391438	0.00153224
124	62	0.91134									62	3.61338	0.0856423	0.309458	2.29507	0.356842	0.818976	0.874995	0.91134	0.0363444	0.00132092
125	63	0.914656									63	3.66551	0.081572	0.299003	2.39189	0.345208	0.825698	0.877815	0.914656	0.0368406	0.00135723
126	64	0.916628									64	3.71707	0.0776904	0.288781	2.48983	0.33396	0.831504	0.880162	0.916628	0.0364658	0.00132976
127	65	0.91409									65	3.76805	0.0739889	0.278794	2.58868	0.323087	0.836369	0.881988	0.91409	0.0321021	0.00103054
128	66	0.913053									66	3.81843	0.0704594	0.269044	2.68822	0.312576	0.840275	0.883248	0.913053	0.0298053	0.000888357
129	67	0.912905									67	3.86818	0.0670938	0.259531	2.78823	0.302418	0.843209	0.883901	0.912905	0.0290044	0.000841256
130	68	0.907964									68	3.9173	0.0638848	0.250256	2.88846	0.2926	0.845163	0.883912	0.907964	0.0240521	0.000578505
131	69	0.902352									69	3.96576	0.0608252	0.241218	2.9887	0.283112	0.846136	0.88325	0.902352	0.019101	0.00036485
132	70	0.899397									70	4.01356	0.057908	0.232417	3.0887	0.273943	0.84613	0.881892	0.899397	0.0175051	0.00030643
133	71	0.892802									71	4.06067	0.0551268	0.223852	3.18824	0.265084	0.845154	0.879817	0.892802	0.0129855	0.000168623
134	72	0.883016									72	4.10709	0.0524753	0.215521	3.2871	0.256525	0.843223	0.877012	0.883016	0.00600457	3.60549e-05
135	73	0.87655									73	4.1528	0.0499475	0.207422	3.38504	0.248256	0.840357	0.87347	0.87655	0.00307966	9.48431e-06
136	74	0.86931									74	4.1978	0.0475378	0.199554	3.48186	0.240268	0.836579	0.86919	0.86931	0.000120026	1.44062e-08
137	75	0.856659									75	4.24208	0.0452405	0.191914	3.57736	0.232551	0.83192	0.864177	0.856659	0.00751777	5.65169e-05
138	76	0.845986									76	4.28562	0.0430507	0.184499	3.67135	0.225098	0.826411	0.858438	0.845986	0.0124523	0.00015506
139	77	0.838483									77	4.32843	0.0409632	0.177307	3.76364	0.217898	0.820092	0.851991	0.838483	0.0135083	0.000182473
140	78	0.825462									78	4.3705	0.0389734	0.170333	3.85409	0.210945	0.813002	0.844854	0.825462	0.0193919	0.000376046
141	79	0.810662									79	4.41181	0.0370767	0.163576	3.94253	0.20423	0.805184	0.837051	0.810662	0.0263888	0.000696371
142	80	0.801935									80	4.45238	0.0352688	0.15703	4.02884	0.197746	0.796685	0.828611	0.801935	0.0266762	0.00071162
143	81	0.79112									81	4.49219	0.0335456	0.150693	4.11289	0.191484	0.787551	0.819566	0.79112	0.0284457	0.00080916
144	82	0.774247									82	4.53125	0.0319031	0.144561	4.1946	0.185437	0.777833	0.80995	0.774247	0.0357026	0.00127467
145	83	0.762644									83	4.56956	0.0303376	0.138629	4.27386	0.179599	0.76758	0.7998	0.762644	0.0371559	0.00138056
146	84	0.75473									84	4.6071	0.0288455	0.132894	4.35063	0.173962	0.756841	0.789156	0.75473	0.034426	0.00118515
147	85	0.739329									85	4.6439	0.0274234	0.127351	4.42483	0.168519	0.745668	0.778058	0.739329	0.0387287	0.00149991
148	86	0.724289									86	4.67994	0.026068	0.121997	4.49644	0.163265	0.73411	0.766548	0.724289	0.0422582	0.00178576
149	87	0.717477									87	4.71523	0.0247762	0.116825	4.56543	0.158192	0.722215	0.754668	0.717477	0.0371909	0.00138317
150	88	0.706464									88	4.74978	0.0235451	0.111834	4.63179	0.153296	0.710032	0.74246	0.706464	0.0359964	0.00129574
151	89	0.689639									89	4.78358	0.0223717	0.107017	4.69552	0.148569	0.697607	0.729968	0.689639	0.0403292	0.00162645
152	90	0.680981									90	4.81665	0.0212535	0.102371	4.75663	0.144006	0.684983	0.717232	0.680981	0.0362504	0.00131409
153	91	0.674812									91	4.84898	0.0201878	0.0978903	4.81516	0.139602	0.672204	0.704292	0.674812	0.02948	0.000869072
154	92	0.659579									92	4.88059	0.0191722	0.0935716	4.87113	0.135351	0.659311	0.69119	0.659579	0.031611	0.000999255
155	93	0.647271									93	4.91148	0.0182043	0.0894101	4.92458	0.131248	0.646341	0.677962	0.647271	0.0306907	0.000941921
156	94	0.643515									94	4.94166	0.0172819	0.0854014	4.97557	0.127288	0.633331	0.664645	0.643515	0.0211297	0.000446462
157	95	0.63299									95	4.97113	0.0164029	0.081541	5.02416	0.123466	0.620314	0.651274	0.63299	0.0182834	0.000334284
158	96	0.617881									96	4.99991	0.0155652	0.0778248	5.07039	0.119778	0.607321	0.637881	0.617881	0.0199996	0.000399982
159	97	0.612627									97	5.028	0.014767	0.0742483	5.11435	0.116218	0.594381	0.624498	0.612627	0.0118709	0.000140917
160	98	0.607482									98	5.0554	0.0140063	0.0708073	5.15609	0.112783	0.581522	0.611153	0.607482	0.00367176	1.34818e-05
161	99	0.592759									99	5.08214	0.0132814	0.0674977	5.1957	0.109469	0.568766	0.597874	0.592759	0.00511453	2.61585e-05
162	100	0.583159									100	5.10822	0.0125906	0.0643153	5.23325	0.10627	0.556137	0.584684	0.583159	0.00152517	2.32613e-06
163	101	0.580821									101	5.13364	0.0119323	0.061256	5.2688	0.103183	0.543653	0.571607	0.580821	0.00921369	8.48921e-05
164	102	0.569834									102	5.15843	0.011305	0.0583159	5.30245	0.100205	0.531333	0.558663	0.569834	0.0111705	0.000124781
165	103	0.55594									103	5.18258	0.0107072	0.055491	5.33427	0.0973313	0.519191	0.545872	0.55594	0.0100677	0.000101359
166	104	0.55201									104	5.20612	0.0101376	0.0527775	5.36433	0.0945584	0.507243	0.533249	0.55201	0.0187613	0.000351988
167	105	0.545825									105	5.22904	0.0095948	0.0501716	5.39272	0.0918829	0.495499	0.52081	0.545825	0.0250147	0.000625734
168	106	0.53055									106	5.25136	0.00907757	0.0476696	5.41951	0.0893015	0.48397	0.508569	0.53055	0.021981	0.000483165
169	107	0.521592									107	5.2731	0.00858471	0.045268	5.44477	0.0868109	0.472665	0.496536	0.521592	0.0250555	0.000627779
170	108	0.518103									108	5.29425	0.00811507	0.0429632	5.46857	0.0844079	0.461591	0.484723	0.518103	0.0333805	0.00111426
171	109	0.505162									109	5.31484	0.00766755	0.0407519	5.491	0.0820896	0.450754	0.473136	0.505162	0.0320252	0.00102561
172	110	0.490849									110	5.33488	0.00724112	0.0386305	5.51211	0.0798529	0.440158	0.461785	0.490849	0.0290643	0.000844734
173	111	0.486042									111	5.35437	0.00683479	0.036596	5.53197	0.0776951	0.429807	0.450674	0.486042	0.0353679	0.00125089
174	112	0.477409									112	5.37333	0.0064476	0.0346451	5.55066	0.0756134	0.419704	0.439808	0.477409	0.0376009	0.00141383
175	113	0.460668									113	5.39176	0.00607867	0.0327747	5.56822	0.0736051	0.40985	0.429192	0.460668	0.0314759	0.000990731
176	114	0.451233									114	5.40969	0.00572712	0.0309819	5.58473	0.0716678	0.400245	0.418827	0.451233	0.0324063	0.00105017
177	115	0.445891									115	5.42711	0.00539214	0.0292638	5.60024	0.0697988	0.39089	0.408715	0.445891	0.0371759	0.00138205
178	116	0.430926									116	5.44404	0.00507296	0.0276174	5.6148	0.0679959	0.381783	0.398857	0.430926	0.0320697	0.00102846
179	117	0.416355									117	5.4605	0.00476882	0.0260402	5.62847	0.0662566	0.372923	0.389253	0.416355	0.0271027	0.000734556
180	118	0.410963									118	5.47649	0.00447903	0.0245294	5.6413	0.0645789	0.364309	0.379902	0.410963	0.0310612	0.000964797
181	119	0.400545									119	5.49202	0.0042029	0.0230824	5.65333	0.0629605	0.355937	0.370803	0.400545	0.0297419	0.000884579
182	120	0.383484									120	5.50711	0.00393978	0.0216968	5.66462	0.0613993	0.347804	0.361955	0.383484	0.0215294	0.000463515
183	121	0.374738									121	5.52176	0.00368908	0.0203702	5.67521	0.0598934	0.339908	0.353354	0.374738	0.0213837	0.000457264
184	122	0.368568									122	5.53599	0.0034502	0.0191003	5.68513	0.0584409	0.332244	0.344998	0.368568	0.0235698	0.000555533
185	123	0.353178									123	5.5498	0.00322259	0.0178847	5.69443	0.0570397	0.324809	0.336884	0.353178	0.0162935	0.000265477
186	124	0.340191									124	5.56321	0.00300571	0.0167214	5.70314	0.0556882	0.317598	0.329009	0.340191	0.0111822	0.000125042
187	125	0.33545									125	5.57622	0.00279906	0.0156082	5.71131	0.0543846	0.310607	0.321367	0.33545	0.0140829	0.000198327
188	126	0.324677									126	5.58885	0.00260216	0.0145431	5.71895	0.0531272	0.303832	0.313956	0.324677	0.0107206	0.000114932
189	127	0.309482									127	5.60111	0.00241454	0.0135241	5.72611	0.0519143	0.297267	0.306771	0.309482	0.00271033	7.34591e-06
190	128	0.303047									128	5.613	0.00223578	0.0125494	5.73282	0.0507445	0.290909	0.299808	0.303047	0.00323902	1.04912e-05
191	129	0.297033									129	5.62454	0.00206545	0.0116172	5.7391	0.0496162	0.284752	0.293061	0.297033	0.00397157	1.57733e-05
192	130	0.282967									130	5.63573	0.00190315	0.0107256	5.74497	0.0485279	0.278791	0.286527	0.282967	0.00355976	1.26719e-05
193	131	0.273496									131	5.64658	0.00174851	0.00987313	5.75047	0.0474782	0.273022	0.2802	0.273496	0.00670419	4.49462e-05
194	132	0.270155									132	5.65711	0.00160117	0.009058	5.75562	0.0464658	0.267439	0.274075	0.270155	0.00392004	1.53667e-05
195	133	0.259839									133	5.66731	0.00146078	0.0082787	5.76043	0.0454894	0.262038	0.268148	0.259839	0.00830922	6.90431e-05
196	134	0.24823									134	5.67721	0.00132701	0.00753374	5.76493	0.0445476	0.256814	0.262413	0.24823	0.0141829	0.000201155
197	135	0.244992									135	5.6868	0.00119956	0.00682166	5.76915	0.0436393	0.251761	0.256866	0.244992	0.0118735	0.00014098
198	136	0.239285									136	5.6961	0.00107812	0.00614107	5.77309	0.0427632	0.246876	0.251501	0.239285	0.0122154	0.000149216
199	137	0.227838									137	5.70512	0.000962408	0.00549065	5.77678	0.0419183	0.242153	0.246314	0.227838	0.0184759	0.000341358
200	138	0.223018									138	5.71386	0.000852157	0.0048691	5.78023	0.0411034	0.237587	0.241299	0.223018	0.0182807	0.000334186
201	139	0.221023									139	5.72233	0.000747109	0.0042752	5.78345	0.0403174	0.233174	0.236452	0.221023	0.0154296	0.000238073
202	140	0.212114									140	5.73053	0.000647018	0.00370776	5.78646	0.0395594	0.228909	0.231768	0.212114	0.0196543	0.000386293
203	141	0.205536									141	5.73849	0.000551651	0.00316564	5.78928	0.0388284	0.224789	0.227243	0.205536	0.0217072	0.000471202
204	142	0.205352									142	5.74619	0.000460784	0.00264775	5.79192	0.0381234	0.220807	0.222871	0.205352	0.0175181	0.000306885
205	143	0.200427									143	5.75366	0.000374205	0.00215305	5.79438	0.0374434	0.216961	0.218647	0.200427	0.0182208	0.000331998
206	144	0.193349									144	5.76089	0.000291713	0.00168052	5.79669	0.0367876	0.213246	0.214569	0.193349	0.0212197	0.000450276
207	145	0.19324									145	5.76789	0.000213113	0.00122921	5.79884	0.0361552	0.209658	0.21063	0.19324	0.0173902	0.000302419
208	146	0.192442									146	5.77468	0.000138223	0.000798194	5.80085	0.0355453	0.206193	0.206826	0.192442	0.0143841	0.000206902
209	147	0.18689									147	5.78125	6.68677e-05	0.000386579	5.80274	0.034957	0.202846	0.203155	0.18689	0.0162647	0.000264539
210	148	0.18617									148	5.78762	-1.11998e-06	0	5.80449	0.0343897	0.199615	0.199615	0.18617	0.0134446	0.000180758
211	149	0.188534									149	5.79378	-6.58988e-05	0	5.80614	0.0338426	0.196495	0.196495	0.188534	0.00796116	6.338e-05
											150	5.79975	-0.00012762	0	5.80767	0.033315	0.193483	0.193483
											151	5.80553	-0.000186428	0	5.80911	0.0328062	0.190575	0.190575
											152	5.81113	-0.000242461	0	5.81045	0.0323155	0.187767	0.187767
											153	5.81655	-0.000295849	0	5.8117	0.0318422	0.185058	0.185058
											154	5.82179	-0.000346717	0	5.81288	0.0313859	0.182442	0.182442
											155	5.82687	-0.000395183	0	5.81397	0.0309457	0.179918	0.179918
											156	5.83179	-0.000441362	0	5.81499	0.0305213	0.177481	0.177481
											157	5.83655	-0.000485362	0	5.81595	0.030112	0.17513	0.17513
											158	5.84116	-0.000527284	0	5.81684	0.0297172	0.17286	0.17286
											159	5.84562	-0.000567228	0	5.81768	0.0293366	0.170671	0.170671
											160	5.84993	-0.000605286	0	5.81846	0.0289695	0.168558	0.168558
											161	5.85411	-0.000641548	0	5.81918	0.0286154	0.166519	0.166519
											162	5.85815	-0.000676098	0	5.81987	0.028274	0.164551	0.164551
											163	5.86206	-0.000709017	0	5.8205	0.0279448	0.162653	0.162653
											164	5.86585	-0.000740382	0	5.8211	0.0276273	0.160821	0.160821
											165	5.86951	-0.000770266	0	5.82165	0.0273211	0.159054	0.159054
											166	5.87306	-0.00079874	0	5.82217	0.0270259	0.157349	0.157349
											167	5.87649	-0.00082587	0	5.82265	0.0267411	0.155704	0.155704
											168	5.87981	-0.000851719	0	5.82311	0.0264665	0.154117	0.154117
											169	5.88302	-0.000876348	0	5.82353	0.0262017	0.152587	0.152587
											170	5.88613	-0.000899814	0	5.82392	0.0259464	0.15111	0.15111
											171	5.88913	-0.000922172	0	5.82429	0.0257002	0.149685	0.149685
											172	5.89204	-0.000943475	0	5.82464	0.0254627	0.148311	0.148311
											173	5.89485	-0.000963772	0	5.82496	0.0252337	0.146985	0.146985
											174	5.89758	-0.000983112	0	5.82526	0.0250129	0.145707	0.145707
											175	5.90021	-0.00100154	0	5.82554	0.0247999	0.144473	0.144473
											176	5.90276	-0.00101909	0	5.8258	0.0245946	0.143283	0.143283
											177	5.90522	-0.00103582	0	5.82605	0.0243966	0.142136	0.142136
											178	5.9076	-0.00105176	0	5.82628	0.0242056	0.141029	0.141029
											179	5.90991	-0.00106694	0	5.82649	0.0240215	0.139961	0.139961
											180	5.91214	-0.00108141	0	5.82669	0.0238439	0.138931	0.138931
											181	5.9143	-0.0010952	0	5.82688	0.0236726	0.137938	0.137938
											182	5.91638	-0.00110833	0	5.82705	0.0235075	0.136979	0.136979
											183	5.9184	-0.00112085	0	5.82722	0.0233483	0.136055	0.136055
											184	5.92035	-0.00113277	0	5.82737	0.0231947	0.135164	0.135164
											185	5.92224	-0.00114413	0	5.82751	0.0230466	0.134304	0.134304
											186	5.92406	-0.00115496	0	5.82764	0.0229038	0.133475	0.133475
											187	5.92583	-0.00116527	0	5.82777	0.0227661	0.132676	0.132676
											188	5.92754	-0.0011751	0	5.82788	0.0226334	0.131905	0.131905
											189	5.92919	-0.00118446	0	5.82799	0.0225053	0.131161	0.131161
											190	5.93078	-0.00119338	0	5.82809	0.0223818	0.130443	0.130443
											191	5.93233	-0.00120188	0	5.82819	0.0222628	0.129752	0.129752
											192	5.93382	-0.00120998	0	5.82828	0.0221479	0.129084	0.129084
											193	5.93526	-0.00121769	0	5.82836	0.0220372	0.128441	0.128441
											194	5.93666	-0.00122505	0	5.82844	0.0219305	0.12782	0.12782
											195	5.93801	-0.00123205	0	5.82851	0.0218275	0.127222	0.127222
											196	5.93932	-0.00123873	0	5.82857	0.0217282	0.126645	0.126645
											197	5.94058	-0.00124508	0	5.82864	0.0216325	0.126088	0.126088
											198	5.9418	-0.00125114	0	5.8287	0.0215402	0.125551	0.125551
											199	5.94298	-0.00125692	0	5.82875	0.0214511	0.125033	0.125033
											200	5.94412	-0.00126242	0	5.8288	0.0213653	0.124534	0.124534
											201	5.94522	-0.00126766	0	5.82885	0.0212825	0.124053	0.124053
											202	5.94629	-0.00127265	0	5.82889	0.0212027	0.123588	0.123588
											203	5.94732	-0.00127741	0	5.82894	0.0211257	0.12314	0.12314
											204	5.94832	-0.00128194	0	5.82898	0.0210515	0.122708	0.122708
											205	5.94929	-0.00128626	0	5.82901	0.0209799	0.122292	0.122292

## Sheet: Alternative 2
GENERAL COMMENT: The best fitting with this interaction model (Alternative 2), shows acceptable differences between the calculated (orange curve) and original (blue curve)
profiles. However, the curve representing the individual effect of the second dose considers a clearly unreal condition, since the effect of the second dose start six days before
it is administrated (red curve). This behavior is physically unaceptable. Therefore, this interaction model was rejected.
	t	E		Parameters		Min	Max	Final	Ref		k	TANH LF1	TANH LF 2	TANH LF	TANH RT1	TANH RT2	TANH RT	RESULT	OBJECTIVE	DEVIATION	DEVIATION ^2
0	-62	0.00346331		LF1	A	2.5	5	3.71693	3		-62	-0.195973	4.89276	0	-0.171428	5.04895	0	0	0.00346331	0.00346331	1.19945e-05		MEAN DEVIATION ^2
1	-61	0.00346331			B	-2	4	3.50344	2.5		-61	-0.194906	4.83838	0	-0.170793	4.9869	0	0	0.00346331	0.00346331	1.19945e-05		0.000238125
2	-60	0.00346331			C	-5	5	0.0296492	0.02		-60	-0.193773	4.78354	0	-0.170127	4.92474	0	0	0.00346331	0.00346331	1.19945e-05
3	-59	0.00350201			D	-100	-40	-40	-70		-59	-0.192573	4.72825	0	-0.169429	4.86249	0	0	0.00350201	0.00350201	1.22641e-05
4	-58	0.00349976		LF2	A	-10	-4.5	-4.50817	-5		-58	-0.191299	4.67254	0	-0.168696	4.80019	0	0	0.00349976	0.00349976	1.22483e-05
5	-57	0.00364166			B	-5	5.4	3.42754	5		-57	-0.189947	4.61641	0	-0.167928	4.73784	0	0	0.00364166	0.00364166	1.32617e-05
6	-56	0.00386265			C	0.01	5	0.0134296	0.015		-56	-0.188514	4.55988	0	-0.167122	4.67548	0	0	0.00386265	0.00386265	1.49201e-05
7	-55	0.00390853			D	0	100	36.8881	50		-55	-0.186994	4.50297	0	-0.166276	4.61311	0	0	0.00390853	0.00390853	1.52766e-05
8	-54	0.00405297		RT1	A	2.5	5	2.51739	3		-54	-0.185382	4.44569	0	-0.165389	4.55078	0	0	0.00405297	0.00405297	1.64265e-05
9	-53	0.00448562			B	-2	4	2.33304	2.5		-53	-0.183672	4.38806	0	-0.164459	4.48849	0	0	0.00448562	0.00448562	2.01208e-05
10	-52	0.00476597			C	-5	5	0.0240448	0.02		-52	-0.181858	4.33011	0	-0.163483	4.42627	0	0	0.00476597	0.00476597	2.27145e-05
11	-51	0.00477919			D	-100	-40	-46.0491	-70		-51	-0.179934	4.27184	0	-0.16246	4.36415	0	0	0.00477919	0.00477919	2.28406e-05
12	-50	0.0051291		RT2	A	-10	-4.5	-4.68953	-5		-50	-0.177894	4.21327	0	-0.161387	4.30214	0	0	0.0051291	0.0051291	2.63076e-05
13	-49	0.00566283			B	-5	5.4	4.68615	5		-49	-0.175731	4.15443	0	-0.160261	4.24026	0	0	0.00566283	0.00566283	3.20676e-05
14	-48	0.00566288			C	0.01	5	0.0132992	0.015		-48	-0.173437	4.09534	0	-0.15908	4.17854	0	0	0.00566288	0.00566288	3.20682e-05
15	-47	0.00584869			D	0	100	72.1172	50		-47	-0.171004	4.03601	0	-0.157842	4.11699	0	0	0.00584869	0.00584869	3.42071e-05
16	-46	0.00648674			Dk	0	45	15.946	35		-46	-0.168424	3.97647	0	-0.156544	4.05565	0	0	0.00648674	0.00648674	4.20778e-05
17	-45	0.00679544									-45	-0.165689	3.91673	0	-0.155182	3.99452	0	0	0.00679544	0.00679544	4.6178e-05
18	-44	0.00706268									-44	-0.162789	3.85681	0	-0.153754	3.93363	0	0	0.00706268	0.00706268	4.98814e-05
19	-43	0.00762059									-43	-0.159714	3.79675	0	-0.152256	3.87301	0	0	0.00762059	0.00762059	5.80733e-05
20	-42	0.00820831									-42	-0.156454	3.73655	0	-0.150686	3.81266	0	0	0.00820831	0.00820831	6.73763e-05
21	-41	0.00867047									-41	-0.152998	3.67624	0	-0.149039	3.75261	0	0	0.00867047	0.00867047	7.51771e-05
22	-40	0.00904204									-40	-0.149335	3.61584	0	-0.147313	3.69287	0	0	0.00904204	0.00904204	8.17585e-05
23	-39	0.00951955									-39	-0.145452	3.55537	0	-0.145502	3.63347	0	0	0.00951955	0.00951955	9.06219e-05
24	-38	0.0101412									-38	-0.141335	3.49485	0	-0.143604	3.57443	0	0	0.0101412	0.0101412	0.000102844
25	-37	0.0104727									-37	-0.136973	3.43432	0	-0.141614	3.51576	0	0	0.0104727	0.0104727	0.000109677
26	-36	0.0103583									-36	-0.13235	3.37378	0	-0.139528	3.45747	0	0	0.0103583	0.0103583	0.000107294
27	-35	0.0109906									-35	-0.12745	3.31325	0	-0.13734	3.39959	0	0	0.0109906	0.0109906	0.000120793
28	-34	0.0116894									-34	-0.122259	3.25277	0	-0.135047	3.34213	0	0	0.0116894	0.0116894	0.000136643
29	-33	0.0111401									-33	-0.116758	3.19236	0	-0.132643	3.28511	0	0	0.0111401	0.0111401	0.000124101
30	-32	0.0114678									-32	-0.11093	3.13202	0	-0.130124	3.22854	0	0	0.0114678	0.0114678	0.00013151
31	-31	0.0132254									-31	-0.104756	3.0718	0	-0.127483	3.17243	0	0	0.0132254	0.0132254	0.00017491
32	-30	0.0131091									-30	-0.0982166	3.0117	0	-0.124714	3.1168	0	0	0.0131091	0.0131091	0.00017185
33	-29	0.0129957									-29	-0.0912902	2.95175	0	-0.121813	3.06167	0	0	0.0129957	0.0129957	0.000168887
34	-28	0.0158914									-28	-0.0839551	2.89197	0	-0.118773	3.00704	0	0	0.0158914	0.0158914	0.000252535
35	-27	0.017845									-27	-0.0761879	2.83238	0	-0.115586	2.95293	0	0	0.017845	0.017845	0.000318443
36	-26	0.0175295									-26	-0.0679642	2.773	0	-0.112247	2.89935	0	0	0.0175295	0.0175295	0.000307285
37	-25	0.0211059									-25	-0.0592584	2.71385	0	-0.108749	2.84631	0	0	0.0211059	0.0211059	0.000445457
38	-24	0.0270359									-24	-0.0500435	2.65495	0	-0.105083	2.79382	0	0	0.0270359	0.0270359	0.00073094
39	-23	0.0286773									-23	-0.040291	2.59633	0	-0.101243	2.74189	0	0	0.0286773	0.0286773	0.00082239
40	-22	0.032617									-22	-0.0299714	2.53799	0	-0.0972193	2.69053	0	0	0.032617	0.032617	0.00106387
41	-21	0.043646									-21	-0.0190533	2.47996	0	-0.0930049	2.63975	0	0	0.043646	0.043646	0.00190497
42	-20	0.051344									-20	-0.00750412	2.42226	0	-0.0885906	2.58955	0	0	0.051344	0.051344	0.0026362
43	-19	0.0574387									-19	0.0047104	2.3649	0.0111396	-0.0839672	2.53995	0	0.0111396	0.0574387	0.0462991	0.00214361
44	-18	0.0736764									-18	0.0176261	2.30791	0.0406793	-0.0791254	2.49094	0	0.0406793	0.0736764	0.032997	0.0010888
45	-17	0.0912153									-17	0.0312803	2.25129	0.0704211	-0.0740553	2.44255	0	0.0704211	0.0912153	0.0207942	0.000432398
46	-16	0.103273									-16	0.0457122	2.19507	0.100342	-0.0687465	2.39476	0	0.100342	0.103273	0.00293117	8.59175e-06
47	-15	0.123808									-15	0.0609626	2.13926	0.130415	-0.0631886	2.3476	0	0.130415	0.123808	0.0066071	4.36537e-05
48	-14	0.151181									-14	0.0770739	2.08388	0.160612	-0.0573703	2.30105	0	0.160612	0.151181	0.00943171	8.89572e-05
49	-13	0.171823									-13	0.0940903	2.02894	0.190903	-0.0512802	2.25513	0	0.190903	0.171823	0.0190798	0.000364039
50	-12	0.196009									-12	0.112058	1.97445	0.221253	-0.0449062	2.20984	0	0.221253	0.196009	0.0252434	0.000637229
51	-11	0.23094									-11	0.131024	1.92043	0.251624	-0.0382361	2.16518	0	0.251624	0.23094	0.0206837	0.000427817
52	-10	0.260858									-10	0.151039	1.8669	0.281975	-0.0312569	2.12115	0	0.281975	0.260858	0.0211174	0.000445943
53	-9	0.287937									-9	0.172154	1.81386	0.312263	-0.0239552	2.07776	0	0.312263	0.287937	0.0243261	0.00059176
54	-8	0.326636									-8	0.19442	1.76133	0.342439	-0.0163173	2.03501	0	0.342439	0.326636	0.0158029	0.000249731
55	-7	0.364765									-7	0.217894	1.70932	0.372451	-0.00832877	1.99289	0	0.372451	0.364765	0.00768606	5.90755e-05
56	-6	0.394168									-6	0.242631	1.65784	0.402243	2.51525e-05	1.95142	4.90831e-05	0.402272	0.394168	0.00810441	6.56815e-05
57	-5	0.431906									-5	0.268689	1.6069	0.431755	0.0087598	1.91058	0.0167363	0.441265	0.431906	0.00935983	8.76065e-05
58	-4	0.475053									-4	0.296126	1.55651	0.460922	0.017891	1.87038	0.0334629	0.478961	0.475053	0.0039079	1.52717e-05
59	-3	0.506931									-3	0.325004	1.50667	0.489675	0.0274351	1.83081	0.0502285	0.515308	0.506931	0.00837687	7.0172e-05
60	-2	0.53992									-2	0.355384	1.4574	0.517939	0.0374089	1.79188	0.0670325	0.550252	0.53992	0.0103321	0.000106751
61	-1	0.582746									-1	0.387329	1.40871	0.545635	0.0478299	1.75359	0.083874	0.583745	0.582746	0.000999029	9.98059e-07
62	0	0.616848									0	0.420902	1.3606	0.57268	0.0587158	1.71593	0.100752	0.615733	0.616848	0.00111449	1.24209e-06
63	1	0.643821									1	0.456166	1.31308	0.598984	0.0700851	1.67889	0.117665	0.64617	0.643821	0.00234839	5.51493e-06
64	2	0.680512									2	0.493188	1.26616	0.624453	0.0819566	1.64249	0.134613	0.675006	0.680512	0.00550553	3.03109e-05
65	3	0.714706									3	0.53203	1.21983	0.648987	0.0943497	1.6067	0.151592	0.702198	0.714706	0.0125083	0.000156458
66	4	0.736498									4	0.572758	1.17411	0.672481	0.107284	1.57154	0.168601	0.727702	0.736498	0.00879659	7.738e-05
67	5	0.763083									5	0.615435	1.129	0.694827	0.120781	1.53699	0.185639	0.751479	0.763083	0.0116046	0.000134667
68	6	0.793535									6	0.660125	1.0845	0.715907	0.13486	1.50305	0.202701	0.773493	0.793535	0.0200415	0.000401662
69	7	0.811428									7	0.706888	1.04062	0.735603	0.149542	1.46972	0.219786	0.793714	0.811428	0.017714	0.000313785
70	8	0.826922									8	0.755784	0.997362	0.75379	0.164851	1.43699	0.236889	0.812115	0.826922	0.0148071	0.00021925
71	9	0.849663									9	0.806871	0.954723	0.770338	0.180806	1.40486	0.254008	0.828674	0.849663	0.0209891	0.000440543
72	10	0.864214									10	0.860203	0.912708	0.785114	0.197431	1.37333	0.271138	0.843378	0.864214	0.0208361	0.000434142
73	11	0.87018									11	0.915832	0.871318	0.79798	0.214748	1.34238	0.288273	0.856217	0.87018	0.0139631	0.000194968
74	12	0.882549									12	0.973805	0.830553	0.808796	0.232781	1.31201	0.30541	0.867192	0.882549	0.0153568	0.00023583
75	13	0.893256									13	1.03417	0.790414	0.817418	0.251551	1.28221	0.322543	0.876309	0.893256	0.0169476	0.000287221
76	14	0.892725									14	1.09695	0.7509	0.8237	0.271083	1.25299	0.339665	0.883583	0.892725	0.00914223	8.35804e-05
77	15	0.894285									15	1.16219	0.712012	0.827495	0.2914	1.22433	0.35677	0.88904	0.894285	0.00524491	2.75091e-05
78	16	0.900007									16	1.22992	0.673748	0.828654	0.312524	1.19623	0.37385	0.892712	0.900007	0.00729552	5.32246e-05
79	17	0.896318									17	1.30014	0.636106	0.827029	0.33448	1.16868	0.390899	0.894643	0.896318	0.00167425	2.80312e-06
80	18	0.888887									18	1.37288	0.599086	0.822473	0.35729	1.14167	0.407907	0.894888	0.888887	0.00600075	3.6009e-05
81	19	0.888369									19	1.44813	0.562684	0.81484	0.380978	1.1152	0.424865	0.893508	0.888369	0.00513951	2.64146e-05
82	20	0.883726									20	1.52589	0.526898	0.803989	0.405565	1.08926	0.441765	0.89058	0.883726	0.00685415	4.69793e-05
83	21	0.870966									21	1.60614	0.491725	0.789781	0.431074	1.06384	0.458595	0.886186	0.870966	0.0152199	0.000231645
84	22	0.863699									22	1.68886	0.457162	0.772083	0.457528	1.03894	0.475345	0.880422	0.863699	0.0167231	0.000279661
85	23	0.858952									23	1.77401	0.423205	0.750769	0.484946	1.01455	0.492004	0.873391	0.858952	0.0144394	0.000208495
86	24	0.845465									24	1.86154	0.389851	0.72572	0.513349	0.990667	0.508558	0.865208	0.845465	0.0197422	0.000389755
87	25	0.832868									25	1.95139	0.357094	0.696829	0.542757	0.967276	0.524996	0.855992	0.832868	0.0231245	0.000534744
88	26	0.827555									26	2.04349	0.324932	0.663994	0.573188	0.944373	0.541303	0.845875	0.827555	0.0183203	0.000335633
89	27	0.817077									27	2.13776	0.293359	0.62713	0.604659	0.921951	0.557466	0.834993	0.817077	0.0179151	0.00032095
90	28	0.80245									28	2.23411	0.262369	0.586161	0.637187	0.900003	0.57347	0.823485	0.80245	0.0210352	0.000442481
91	29	0.795882									29	2.33243	0.231959	0.541027	0.670786	0.878521	0.589299	0.811499	0.795882	0.0156168	0.000243885
92	30	0.790133									30	2.4326	0.202122	0.491681	0.705468	0.857498	0.604937	0.799182	0.790133	0.00904972	8.18973e-05
93	31	0.777519									31	2.5345	0.172853	0.438095	0.741246	0.836926	0.620368	0.786683	0.777519	0.00916389	8.39769e-05
94	32	0.76976									32	2.63798	0.144146	0.380254	0.778128	0.816799	0.635574	0.774148	0.76976	0.0043885	1.92589e-05
95	33	0.768358									33	2.7429	0.115995	0.318163	0.816122	0.797108	0.650537	0.761724	0.768358	0.00663467	4.40189e-05
96	34	0.761234									34	2.84911	0.0883942	0.251844	0.855233	0.777848	0.665241	0.749548	0.761234	0.0116866	0.000136576
97	35	0.753699									35	2.95642	0.0613369	0.181338	0.895463	0.759009	0.679665	0.737754	0.753699	0.0159455	0.00025426
98	36	0.754948									36	3.06468	0.0348169	0.106703	0.936814	0.740586	0.693791	0.726464	0.754948	0.0284836	0.000811314
99	37	0.754956									37	3.1737	0.00882758	0.0280161	0.979282	0.72257	0.707599	0.715791	0.754956	0.0391646	0.00153386
100	38	0.750146									38	3.28329	-0.0166378	0	1.02286	0.704954	0.721071	0.721071	0.750146	0.0290744	0.000845321
101	39	0.752252									39	3.39327	-0.0415859	0	1.06755	0.687732	0.734187	0.734187	0.752252	0.0180651	0.000326347
102	40	0.758561									40	3.50344	-0.0660237	0	1.11333	0.670896	0.746926	0.746926	0.758561	0.0116352	0.000135379
103	41	0.758973									41	3.61362	-0.0899581	0	1.16018	0.654439	0.759269	0.759269	0.758973	0.000296585	8.79628e-08
104	42	0.761307									42	3.72359	-0.113396	0	1.2081	0.638355	0.771197	0.771197	0.761307	0.00989034	9.78189e-05
105	43	0.771174									43	3.83319	-0.136345	0	1.25706	0.622635	0.78269	0.78269	0.771174	0.0115158	0.000132613
106	44	0.77787									44	3.9422	-0.158812	0	1.30704	0.607273	0.793729	0.793729	0.77787	0.0158589	0.000251506
107	45	0.78124									45	4.05046	-0.180803	0	1.358	0.592263	0.804295	0.804295	0.78124	0.0230542	0.000531498
108	46	0.791484									46	4.15778	-0.202327	0	1.40993	0.577597	0.814369	0.814369	0.791484	0.0228854	0.000523743
109	47	0.803162									47	4.26398	-0.223391	0	1.46277	0.563269	0.823935	0.823935	0.803162	0.0207727	0.000431505
110	48	0.808926									48	4.36891	-0.244001	0	1.5165	0.549273	0.832975	0.832975	0.808926	0.0240481	0.000578309
111	49	0.817472									49	4.47239	-0.264165	0	1.57108	0.535601	0.841472	0.841472	0.817472	0.0240005	0.000576022
112	50	0.830986									50	4.57429	-0.283891	0	1.62646	0.522246	0.849412	0.849412	0.830986	0.018426	0.000339516
113	51	0.839657									51	4.67446	-0.303185	0	1.68259	0.509204	0.856781	0.856781	0.839657	0.017124	0.00029323
114	52	0.846192									52	4.77278	-0.322055	0	1.73942	0.496467	0.863564	0.863564	0.846192	0.017372	0.000301787
115	53	0.858088									53	4.86913	-0.340509	0	1.7969	0.484029	0.869751	0.869751	0.858088	0.0116627	0.000136019
116	54	0.868494									54	4.9634	-0.358552	0	1.85497	0.471884	0.87533	0.87533	0.868494	0.00683648	4.67374e-05
117	55	0.873713									55	5.0555	-0.376193	0	1.91357	0.460026	0.880293	0.880293	0.873713	0.00657957	4.32907e-05
118	56	0.881925									56	5.14535	-0.393439	0	1.97265	0.448449	0.884631	0.884631	0.881925	0.00270584	7.32156e-06
119	57	0.891754									57	5.23288	-0.410297	0	2.03213	0.437146	0.888338	0.888338	0.891754	0.00341546	1.16653e-05
120	58	0.896198									58	5.31803	-0.426774	0	2.09196	0.426113	0.89141	0.89141	0.896198	0.00478806	2.29256e-05
121	59	0.900272									59	5.40074	-0.442876	0	2.15206	0.415343	0.893843	0.893843	0.900272	0.00642929	4.13358e-05
122	60	0.907461									60	5.48099	-0.458612	0	2.21237	0.404831	0.895635	0.895635	0.907461	0.0118259	0.000139852
123	61	0.910899									61	5.55875	-0.473987	0	2.27282	0.394571	0.896788	0.896788	0.910899	0.0141107	0.000199112
124	62	0.91134									62	5.63401	-0.489009	0	2.33334	0.384558	0.897303	0.897303	0.91134	0.0140367	0.000197029
125	63	0.914656									63	5.70674	-0.503685	0	2.39385	0.374786	0.897184	0.897184	0.914656	0.0174721	0.000305274
126	64	0.916628									64	5.77697	-0.518021	0	2.4543	0.36525	0.896435	0.896435	0.916628	0.0201931	0.00040776
127	65	0.91409									65	5.84469	-0.532024	0	2.51461	0.355945	0.895064	0.895064	0.91409	0.0190258	0.000361983
128	66	0.913053									66	5.90994	-0.5457	0	2.57471	0.346866	0.89308	0.89308	0.913053	0.0199729	0.000398917
129	67	0.912905									67	5.97272	-0.559057	0	2.63453	0.338008	0.890493	0.890493	0.912905	0.0224125	0.000502322
130	68	0.907964									68	6.03308	-0.5721	0	2.69401	0.329365	0.887314	0.887314	0.907964	0.0206502	0.000426432
131	69	0.902352									69	6.09106	-0.584835	0	2.75308	0.320933	0.883556	0.883556	0.902352	0.018795	0.000353253
132	70	0.899397									70	6.14668	-0.59727	0	2.81168	0.312708	0.879235	0.879235	0.899397	0.0201616	0.000406489
133	71	0.892802									71	6.20002	-0.609411	0	2.86975	0.304684	0.874366	0.874366	0.892802	0.0184361	0.000339889
134	72	0.883016									72	6.2511	-0.621262	0	2.92722	0.296857	0.868966	0.868966	0.883016	0.0140508	0.000197424
135	73	0.87655									73	6.3	-0.632832	0	2.98405	0.289222	0.863052	0.863052	0.87655	0.0134975	0.000182182
136	74	0.86931									74	6.34676	-0.644125	0	3.04017	0.281776	0.856646	0.856646	0.86931	0.0126649	0.000160399
137	75	0.856659									75	6.39145	-0.655147	0	3.09554	0.274513	0.849765	0.849765	0.856659	0.00689373	4.75236e-05
138	76	0.845986									76	6.43413	-0.665904	0	3.15011	0.26743	0.842432	0.842432	0.845986	0.00355442	1.26339e-05
139	77	0.838483									77	6.47486	-0.676402	0	3.20383	0.260522	0.834667	0.834667	0.838483	0.00381567	1.45593e-05
140	78	0.825462									78	6.5137	-0.686647	0	3.25667	0.253785	0.826493	0.826493	0.825462	0.00103106	1.06309e-06
141	79	0.810662									79	6.55072	-0.696643	0	3.30858	0.247215	0.817932	0.817932	0.810662	0.00726967	5.28481e-05
142	80	0.801935									80	6.58599	-0.706397	0	3.35954	0.240809	0.809007	0.809007	0.801935	0.00707193	5.00122e-05
143	81	0.79112									81	6.61956	-0.715914	0	3.4095	0.234562	0.799741	0.799741	0.79112	0.00862096	7.4321e-05
144	82	0.774247									82	6.6515	-0.725198	0	3.45845	0.228471	0.790158	0.790158	0.774247	0.0159104	0.00025314
145	83	0.762644									83	6.68188	-0.734256	0	3.50636	0.222532	0.780279	0.780279	0.762644	0.0176354	0.000311006
146	84	0.75473									84	6.71076	-0.743092	0	3.55321	0.216742	0.77013	0.77013	0.75473	0.0154	0.000237161
147	85	0.739329									85	6.7382	-0.751711	0	3.59898	0.211097	0.759732	0.759732	0.739329	0.0204027	0.000416269
148	86	0.724289									86	6.76426	-0.760118	0	3.64365	0.205593	0.749108	0.749108	0.724289	0.0248182	0.000615945
149	87	0.717477									87	6.78899	-0.768318	0	3.68722	0.200227	0.73828	0.73828	0.717477	0.0208033	0.000432778
150	88	0.706464									88	6.81247	-0.776315	0	3.72968	0.194996	0.727271	0.727271	0.706464	0.0208069	0.000432927
151	89	0.689639									89	6.83473	-0.784115	0	3.77102	0.189896	0.716102	0.716102	0.689639	0.026463	0.000700292
152	90	0.680981									90	6.85585	-0.791721	0	3.81124	0.184925	0.704793	0.704793	0.680981	0.0238118	0.000567004
153	91	0.674812									91	6.87586	-0.799138	0	3.85034	0.180079	0.693366	0.693366	0.674812	0.0185532	0.000344223
154	92	0.659579									92	6.89483	-0.806371	0	3.88832	0.175356	0.681839	0.681839	0.659579	0.0222602	0.000495519
155	93	0.647271									93	6.9128	-0.813424	0	3.92519	0.170751	0.670232	0.670232	0.647271	0.0229612	0.000527217
156	94	0.643515									94	6.92981	-0.820301	0	3.96096	0.166264	0.658564	0.658564	0.643515	0.0150484	0.000226455
157	95	0.63299									95	6.94592	-0.827006	0	3.99563	0.161889	0.646851	0.646851	0.63299	0.0138604	0.00019211
158	96	0.617881									96	6.96117	-0.833543	0	4.02922	0.157626	0.63511	0.63511	0.617881	0.0172285	0.000296823
159	97	0.612627									97	6.97561	-0.839917	0	4.06174	0.153471	0.623358	0.623358	0.612627	0.0107309	0.000115152
160	98	0.607482									98	6.98926	-0.84613	0	4.0932	0.149421	0.61161	0.61161	0.607482	0.0041282	1.7042e-05
161	99	0.592759									99	7.00218	-0.852187	0	4.12362	0.145474	0.59988	0.59988	0.592759	0.00712043	5.07005e-05
162	100	0.583159									100	7.01439	-0.858092	0	4.15302	0.141627	0.588181	0.588181	0.583159	0.00502246	2.52251e-05
163	101	0.580821									101	7.02594	-0.863848	0	4.18141	0.137879	0.576528	0.576528	0.580821	0.0042929	1.8429e-05
164	102	0.569834									102	7.03686	-0.869458	0	4.20882	0.134226	0.564931	0.564931	0.569834	0.00490275	2.40369e-05
165	103	0.55594									103	7.04718	-0.874927	0	4.23526	0.130665	0.553403	0.553403	0.55594	0.00253688	6.43575e-06
166	104	0.55201									104	7.05693	-0.880257	0	4.26076	0.127196	0.541953	0.541953	0.55201	0.0100577	0.000101158
167	105	0.545825									105	7.06615	-0.885452	0	4.28534	0.123815	0.530591	0.530591	0.545825	0.0152337	0.000232066
168	106	0.53055									106	7.07485	-0.890516	0	4.30902	0.120521	0.519328	0.519328	0.53055	0.0112223	0.000125941
169	107	0.521592									107	7.08307	-0.89545	0	4.33182	0.117311	0.50817	0.50817	0.521592	0.013422	0.000180151
170	108	0.518103									108	7.09084	-0.90026	0	4.35377	0.114183	0.497126	0.497126	0.518103	0.0209775	0.000440056
171	109	0.505162									109	7.09818	-0.904947	0	4.37489	0.111135	0.486202	0.486202	0.505162	0.0189594	0.00035946
172	110	0.490849									110	7.1051	-0.909514	0	4.3952	0.108165	0.475406	0.475406	0.490849	0.0154433	0.000238496
173	111	0.486042									111	7.11164	-0.913965	0	4.41472	0.105271	0.464743	0.464743	0.486042	0.0212994	0.000453664
174	112	0.477409									112	7.11782	-0.918302	0	4.43349	0.102452	0.454217	0.454217	0.477409	0.0231922	0.000537876
175	113	0.460668									113	7.12364	-0.922529	0	4.45151	0.0997043	0.443835	0.443835	0.460668	0.0168329	0.000283348
176	114	0.451233									114	7.12915	-0.926647	0	4.46882	0.0970276	0.433599	0.433599	0.451233	0.0176338	0.000310951
177	115	0.445891									115	7.13434	-0.93066	0	4.48544	0.0944197	0.423514	0.423514	0.445891	0.0223765	0.000500708
178	116	0.430926									116	7.13924	-0.93457	0	4.50139	0.0918789	0.413583	0.413583	0.430926	0.0173437	0.000300804
179	117	0.416355									117	7.14386	-0.93838	0	4.51669	0.0894034	0.403807	0.403807	0.416355	0.0125478	0.000157448
180	118	0.410963									118	7.14822	-0.942092	0	4.53137	0.0869916	0.394191	0.394191	0.410963	0.0167721	0.000281305
181	119	0.400545									119	7.15234	-0.945708	0	4.54544	0.0846419	0.384735	0.384735	0.400545	0.0158103	0.000249965
182	120	0.383484									120	7.15622	-0.949232	0	4.55893	0.0823528	0.375441	0.375441	0.383484	0.0080435	6.46979e-05
183	121	0.374738									121	7.15989	-0.952664	0	4.57186	0.0801226	0.366309	0.366309	0.374738	0.00842831	7.10364e-05
184	122	0.368568									122	7.16334	-0.956009	0	4.58425	0.0779499	0.357342	0.357342	0.368568	0.011226	0.000126023
185	123	0.353178									123	7.1666	-0.959267	0	4.59612	0.0758333	0.348539	0.348539	0.353178	0.0046389	2.15194e-05
186	124	0.340191									124	7.16968	-0.962441	0	4.60748	0.0737714	0.3399	0.3399	0.340191	0.000290627	8.44643e-08
187	125	0.33545									125	7.17258	-0.965533	0	4.61836	0.0717626	0.331426	0.331426	0.33545	0.00402425	1.61946e-05
188	126	0.324677									126	7.17531	-0.968545	0	4.62878	0.0698058	0.323116	0.323116	0.324677	0.00156126	2.43754e-06
189	127	0.309482									127	7.17789	-0.97148	0	4.63875	0.0678995	0.314969	0.314969	0.309482	0.00548726	3.011e-05
190	128	0.303047									128	7.18032	-0.974338	0	4.64829	0.0660426	0.306985	0.306985	0.303047	0.00393802	1.5508e-05
191	129	0.297033									129	7.18262	-0.977123	0	4.65741	0.0642336	0.299163	0.299163	0.297033	0.00212978	4.53598e-06
192	130	0.282967									130	7.18478	-0.979835	0	4.66615	0.0624715	0.291501	0.291501	0.282967	0.00853391	7.28276e-05
193	131	0.273496									131	7.18682	-0.982477	0	4.6745	0.0607549	0.283999	0.283999	0.273496	0.0105032	0.000110317
194	132	0.270155									132	7.18874	-0.985051	0	4.68248	0.0590828	0.276654	0.276654	0.270155	0.00649936	4.22416e-05
195	133	0.259839									133	7.19056	-0.987558	0	4.69012	0.0574541	0.269466	0.269466	0.259839	0.00962773	9.26932e-05
196	134	0.24823									134	7.19227	-0.989999	0	4.69741	0.0558675	0.262433	0.262433	0.24823	0.0142028	0.000201718
197	135	0.244992									135	7.19388	-0.992378	0	4.70439	0.0543221	0.255552	0.255552	0.244992	0.01056	0.000111514
198	136	0.239285									136	7.1954	-0.994694	0	4.71106	0.0528167	0.248822	0.248822	0.239285	0.00953698	9.09539e-05
199	137	0.227838									137	7.19683	-0.99695	0	4.71743	0.0513503	0.242242	0.242242	0.227838	0.0144039	0.000207471
200	138	0.223018									138	7.19819	-0.999148	0	4.72352	0.0499221	0.235808	0.235808	0.223018	0.0127894	0.000163568
201	139	0.221023									139	7.19946	-1.00129	0	4.72933	0.0485308	0.229518	0.229518	0.221023	0.00849588	7.21799e-05
202	140	0.212114									140	7.20066	-1.00337	0	4.73489	0.0471757	0.223372	0.223372	0.212114	0.0112578	0.000126739
203	141	0.205536									141	7.20179	-1.0054	0	4.74019	0.0458558	0.217366	0.217366	0.205536	0.01183	0.000139949
204	142	0.205352									142	7.20286	-1.00738	0	4.74526	0.0445702	0.211497	0.211497	0.205352	0.00614486	3.77592e-05
205	143	0.200427									143	7.20387	-1.00931	0	4.7501	0.043318	0.205765	0.205765	0.200427	0.00533828	2.84972e-05
206	144	0.193349									144	7.20481	-1.01118	0	4.75472	0.0420983	0.200166	0.200166	0.193349	0.00681697	4.64711e-05
207	145	0.19324									145	7.20571	-1.01301	0	4.75913	0.0409104	0.194698	0.194698	0.19324	0.00145836	2.12683e-06
208	146	0.192442									146	7.20655	-1.01479	0	4.76335	0.0397533	0.189359	0.189359	0.192442	0.0030837	9.50922e-06
209	147	0.18689									147	7.20735	-1.01652	0	4.76737	0.0386263	0.184146	0.184146	0.18689	0.0027441	7.53011e-06
210	148	0.18617									148	7.20809	-1.01821	0	4.77121	0.0375286	0.179057	0.179057	0.18617	0.00711351	5.0602e-05
211	149	0.188534									149	7.2088	-1.01985	0	4.77487	0.0364595	0.17409	0.17409	0.188534	0.0144443	0.000208638
											150	7.20947	-1.02145	0	4.77837	0.0354183	0.169241	0.169241
											151	7.21009	-1.02301	0	4.78171	0.0344041	0.16451	0.16451
											152	7.21068	-1.02453	0	4.78489	0.0334163	0.159894	0.159894
											153	7.21124	-1.026	0	4.78793	0.0324543	0.155389	0.155389
											154	7.21177	-1.02744	0	4.79083	0.0315173	0.150994	0.150994
											155	7.21226	-1.02884	0	4.7936	0.0306048	0.146707	0.146707
											156	7.21273	-1.03021	0	4.79624	0.029716	0.142525	0.142525
											157	7.21317	-1.03154	0	4.79876	0.0288504	0.138446	0.138446
											158	7.21358	-1.03283	0	4.80116	0.0280073	0.134468	0.134468
											159	7.21397	-1.03409	0	4.80345	0.0271863	0.130588	0.130588
											160	7.21434	-1.03532	0	4.80564	0.0263866	0.126805	0.126805
											161	7.21469	-1.03651	0	4.80772	0.0256078	0.123115	0.123115
											162	7.21502	-1.03768	0	4.80971	0.0248494	0.119518	0.119518
											163	7.21532	-1.03881	0	4.81161	0.0241107	0.116011	0.116011
											164	7.21561	-1.03991	0	4.81342	0.0233913	0.112592	0.112592
											165	7.21589	-1.04099	0	4.81514	0.0226906	0.109259	0.109259
											166	7.21615	-1.04203	0	4.81679	0.0220083	0.106009	0.106009
											167	7.21639	-1.04305	0	4.81836	0.0213437	0.102842	0.102842
											168	7.21662	-1.04404	0	4.81986	0.0206966	0.0997545	0.0997545
											169	7.21683	-1.04501	0	4.82128	0.0200663	0.0967453	0.0967453
											170	7.21704	-1.04595	0	4.82264	0.0194525	0.0938124	0.0938124
											171	7.21723	-1.04687	0	4.82394	0.0188547	0.090954	0.090954
											172	7.21741	-1.04776	0	4.82518	0.0182725	0.0881683	0.0881683
											173	7.21758	-1.04862	0	4.82636	0.0177056	0.0854535	0.0854535
											174	7.21774	-1.04947	0	4.82749	0.0171534	0.082808	0.082808
											175	7.21789	-1.05029	0	4.82856	0.0166157	0.08023	0.08023
											176	7.21804	-1.05109	0	4.82958	0.0160921	0.077718	0.077718
											177	7.21817	-1.05187	0	4.83056	0.0155821	0.0752703	0.0752703
											178	7.2183	-1.05263	0	4.83149	0.0150855	0.0728853	0.0728853
											179	7.21842	-1.05337	0	4.83237	0.0146018	0.0705615	0.0705615
											180	7.21853	-1.05409	0	4.83322	0.0141308	0.0682973	0.0682973
											181	7.21864	-1.05479	0	4.83402	0.0136721	0.0660914	0.0660914
											182	7.21874	-1.05548	0	4.83479	0.0132254	0.0639423	0.0639423
											183	7.21883	-1.05614	0	4.83552	0.0127904	0.0618485	0.0618485
											184	7.21892	-1.05679	0	4.83622	0.0123668	0.0598087	0.0598087
											185	7.219	-1.05742	0	4.83689	0.0119543	0.0578215	0.0578215
											186	7.21908	-1.05803	0	4.83752	0.0115525	0.0558856	0.0558856
											187	7.21916	-1.05863	0	4.83813	0.0111613	0.0539997	0.0539997
											188	7.21923	-1.05921	0	4.8387	0.0107803	0.0521626	0.0521626
											189	7.21929	-1.05978	0	4.83925	0.0104092	0.050373	0.050373
											190	7.21935	-1.06033	0	4.83978	0.0100479	0.0486297	0.0486297
											191	7.21941	-1.06087	0	4.84028	0.00969607	0.0469316	0.0469316
											192	7.21947	-1.06139	0	4.84075	0.00935341	0.0452776	0.0452776
											193	7.21952	-1.0619	0	4.84121	0.00901973	0.0436664	0.0436664
											194	7.21957	-1.06239	0	4.84164	0.00869478	0.042097	0.042097
											195	7.21962	-1.06288	0	4.84205	0.00837834	0.0405684	0.0405684
											196	7.21966	-1.06334	0	4.84244	0.00807019	0.0390794	0.0390794
											197	7.2197	-1.0638	0	4.84282	0.0077701	0.0376292	0.0376292
											198	7.21974	-1.06425	0	4.84318	0.00747787	0.0362167	0.0362167
											199	7.21978	-1.06468	0	4.84352	0.0071933	0.0348409	0.0348409
											200	7.21981	-1.0651	0	4.84384	0.00691618	0.0335009	0.0335009
											201	7.21984	-1.06551	0	4.84415	0.00664631	0.0321957	0.0321957
											202	7.21987	-1.06591	0	4.84444	0.00638352	0.0309246	0.0309246
											203	7.2199	-1.0663	0	4.84473	0.00612761	0.0296866	0.0296866
											204	7.21993	-1.06668	0	4.84499	0.0058784	0.0284808	0.0284808
											205	7.21996	-1.06705	0	4.84525	0.00563572	0.0273064	0.0273064
